1 **A secondary metabolite drives intraspecies antagonism in a gut symbiont that is inhibited**  
2 **by peptidoglycan acetylation**

3

4 Mustafa Özçam<sup>1,2</sup>, Jee-Hwan Oh<sup>1</sup>, Restituto Tocmo<sup>1,3</sup>, Deepa Acharya<sup>4</sup>, Shenwei Zhang<sup>1</sup>, Silvette Ruiz-Ramírez<sup>1</sup>,  
5 Fuyong Li<sup>5</sup>, Christopher C. Cheng<sup>6</sup>, Eugenio Vivas<sup>7</sup>, Federico E. Rey<sup>7</sup>, Jan Claesen<sup>8</sup>, Tim Bugni<sup>4</sup>, Jens Walter<sup>5,6,9,10</sup>,  
6 Jan-Peter van Pijkeren<sup>1,11\*</sup>

7

8 <sup>1</sup> Department of Food Science, University of Wisconsin-Madison, Madison, WI, 53706, USA

9 <sup>2</sup> Division of Gastroenterology, Department of Medicine, University of California San Francisco, CA, 94141, USA.

10 <sup>3</sup> Present Address: Department of Pharmacy Practice, University of Illinois at Chicago, Chicago, IL, 60612, USA

11 <sup>4</sup> Department of Pharmacy, University of Wisconsin-Madison, Madison, WI, 53706, USA

12 <sup>5</sup> Department of Agriculture, Food and Nutritional Science, University of Alberta, Edmonton, AB T6G 2P5, Canada

13 <sup>6</sup> Department of Biological Sciences, University of Alberta, Edmonton, AB T6G 2P5, Canada;

14 <sup>7</sup> Department of Bacteriology, University of Wisconsin-Madison, Madison, WI, 53706, USA

15 <sup>8</sup> Department of Cardiovascular and Metabolic Sciences and Center for Microbiome and Human Health, Lerner  
16 Research Institute, Cleveland Clinic, Cleveland, OH, 44195, USA

17 <sup>9</sup> Department of Medicine and APC Microbiome Ireland, University College Cork, Cork T12 K8AF, Ireland;

18 <sup>10</sup> School of Microbiology, University College Cork, Cork T12 YT20, Ireland.

19 <sup>11</sup> Lead Contact

20 \*Correspondence: [vanpijkeren@wisc.edu](mailto:vanpijkeren@wisc.edu)

21

22 **SUMMARY**

23           The mammalian microbiome encodes numerous secondary metabolite biosynthetic gene  
24 clusters, yet their role in microbe-microbe interactions is unclear. Here, we characterized two  
25 polyketide synthase gene clusters (*fun* and *pks*) in the gut symbiont *Limosilactobacillus reuteri*.  
26 The *pks*, but not the *fun* cluster, encodes antimicrobial activity. Forty-one out of 51 *L. reuteri*  
27 strains tested are sensitive to Pks products, which was independent of strains' host origin. The  
28 sensitivity to Pks was also established in intraspecies competition experiments in gnotobiotic  
29 mice. Comparative genome analyses between Pks-resistant and sensitive strains identified an  
30 acyltransferase gene (*act*) that is unique to Pks-resistant strains. Subsequent peptidoglycan  
31 analysis of the wild-type and the *act* mutant strains showed that Act acetylates peptidoglycan.  
32 The *pks* mutants lost their competitive advantage and *act* mutants lost their Pks resistance *in*  
33 *vivo*. Thus, our findings provide mechanistic insights into how closely related gut symbionts can  
34 compete and co-exist in the gastrointestinal tract.

35

36

37

38

39 **Keywords:** *Limosilactobacillus reuteri*, gut symbiont, polyketide, polyene, secondary  
40 metabolite, biosynthetic gene clusters, acyltransferase, antimicrobial, acetylation, microbial  
41 competition

42

## 43 INTRODUCTION

44 The mammalian gastrointestinal tract is inhabited by trillions of microorganisms that  
45 coexist with their host (Sender et al., 2016). While factors like host genetics, immune status,  
46 nutritional resources and colonization history affect microbial composition (Bonder et al., 2016;  
47 David et al., 2014; Hooper et al., 2015; Martínez et al., 2018; Snijders et al., 2016; Turnbaugh et  
48 al., 2009; Zarrinpar et al., 2014), the relationship between microbes is determined by competitive  
49 interactions (Boon et al., 2014). Bacteria have developed numerous strategies that mediate  
50 survival and competition, including the production of broad and narrow spectrum antimicrobials  
51 (Sassone-Corsi et al., 2016). On the other hand, acquisition of resistance genes and/or  
52 modification of the cell wall can help bacteria survive the antimicrobial warfare in the gut  
53 (Murray and Shaw, 1997).

54 Some bacterial secondary metabolites have antimicrobial activity against other  
55 community members. Their interactions—known as interference competition—are important in  
56 the assembly and the maintenance of microbial communities (Jacobson et al., 2018). Most  
57 secondary metabolites are produced by biosynthetic gene clusters (BGCs) and polyketide  
58 synthase (PKS) gene clusters form a prominent subclass, involved in the biosynthesis of carbon  
59 chain backbones from the repeated condensation of acyl-CoA building blocks (Lin et al., 2015;  
60 Medema et al., 2014). A survey of 2,430 reference genomes from the Human Microbiome  
61 Project uncovered more than 3,000 BGCs (Donia et al., 2014). So far, only seven PKS-like  
62 BGCs encoded by gut-associated bacteria have been functionally characterized (Figure S1).

63 As a class of polyketide synthase products, aryl polyenes are lipids with an aryl head  
64 group conjugated to a polyene tail (Lin et al., 2015) and are widely distributed in soil and host-  
65 associated bacteria (Cimermancic et al., 2014; Youngblut et al., 2020). Although, many polyene

66 compounds isolated from terrestrial and marine microbes possess antimicrobial affects *in vitro*  
67 (Herbrík et al., 2020; Lee et al., 2020; Li et al., 2021; Zhao et al., 2021), virtually nothing is  
68 known about their ecological role in microbe-host and microbe-microbe interactions in the  
69 mammalian gastrointestinal tract (Aleti et al., 2019). While metagenome studies are critically  
70 important to identify novel polyene-like BGCs within the microbiome (Hiergeist et al., 2015;  
71 Medema et al., 2011), the assessment of model organisms and their isogenic mutants in the  
72 appropriate ecological context is critical to advance our knowledge on the biological function of  
73 these BGC-derived compounds.

74 *Limosilactobacillus reuteri*, until recently known as *Lactobacillus reuteri* (Zheng et al.,  
75 2020) is a gut symbiont species that inhabits the gastrointestinal tract of various vertebrates,  
76 including rodents, birds and primates (Duar et al., 2017). This, combined with the available  
77 genome editing tools (Oh and Van Pijkeren, 2014; Van Pijkeren et al., 2012; Zhang et al., 2018),  
78 make *L. reuteri* an ideal model organism to study microbe-microbe, microbe-phage and microbe-  
79 host interactions (Lin et al., 2018; Oh et al., 2019; Özçam et al., 2019; Walter et al., 2011).  
80 Previously, we identified two genetically distinct PKS clusters (*pks* and *fun*) in *L. reuteri* R2lc  
81 that activated the Aryl Hydrocarbon Receptor (Özçam and van Pijkeren, 2019).

82 In this study, we found that the *pks* cluster in *L. reuteri* R2lc encodes antimicrobial  
83 activity. Intraspecies competition experiments in gnotobiotic mice with the wild-type and the *pks*  
84 deletion mutant revealed that Pks expression can provide a competitive advantage. Remarkably,  
85 a small number *L. reuteri* strains were resistant to the antimicrobial activity of Pks. We  
86 discovered this resistance was driven by a gene encoding an acetyltransferase gene that increases  
87 peptidoglycan acetylation. Thus, our findings uncovered mechanisms by which gut symbionts

88 can compete and co-exist with closely related strains through secondary metabolite production  
89 and cell-wall modification.

90

## 91 **RESULTS**

### 92 ***L. reuteri* Pks inhibits the competitor strain**

93 The rodent isolate *L. reuteri* R2lc contains two PKS clusters, *fun* and *pks* (Figure 1A). In  
94 both the human and rodent gut ecosystem, *L. reuteri* R2lc outcompetes most *L. reuteri* strains,  
95 including the rodent isolate *L. reuteri* 100-23 (Duar et al., 2017; Oh et al., 2009). Because select  
96 PKS products have antimicrobial activity (Lin et al., 2015), we tested to what extent Pks and Fun  
97 provide strain R2lc with a competitive advantage. We performed *in vitro* competition  
98 experiments in batch cultures using 1:1 mixtures of the rodent gut isolates *L. reuteri* 100-23 and  
99 *L. reuteri* R2lc wild type, or our previously generated PKS mutants (R2lc $\Delta$ *fun* or R2lc $\Delta$ *pks*)  
100 (Özçam et al., 2019). Following 24 hours of incubation, the mixed cultures were plated. On agar,  
101 R2lc and its derivatives form pigmented colonies, while 100-23 colonies are opaque color in  
102 appearance. Co-incubation of R2lc + 100-23 or R2lc $\Delta$ *fun* + 100-23 only recovered pigmented  
103 colonies; however, co-incubation of R2lc $\Delta$ *pks* + 100-23 yielded a mixture of pigmented and  
104 opaque colonies (% pigmented:opaque colony distribution is 29:71) (Figure 1B). These data  
105 suggest that R2lc *pks* but not *fun* cluster provides strain R2lc with a competitive advantage when  
106 co-cultured with *L. reuteri* 100-23.

107

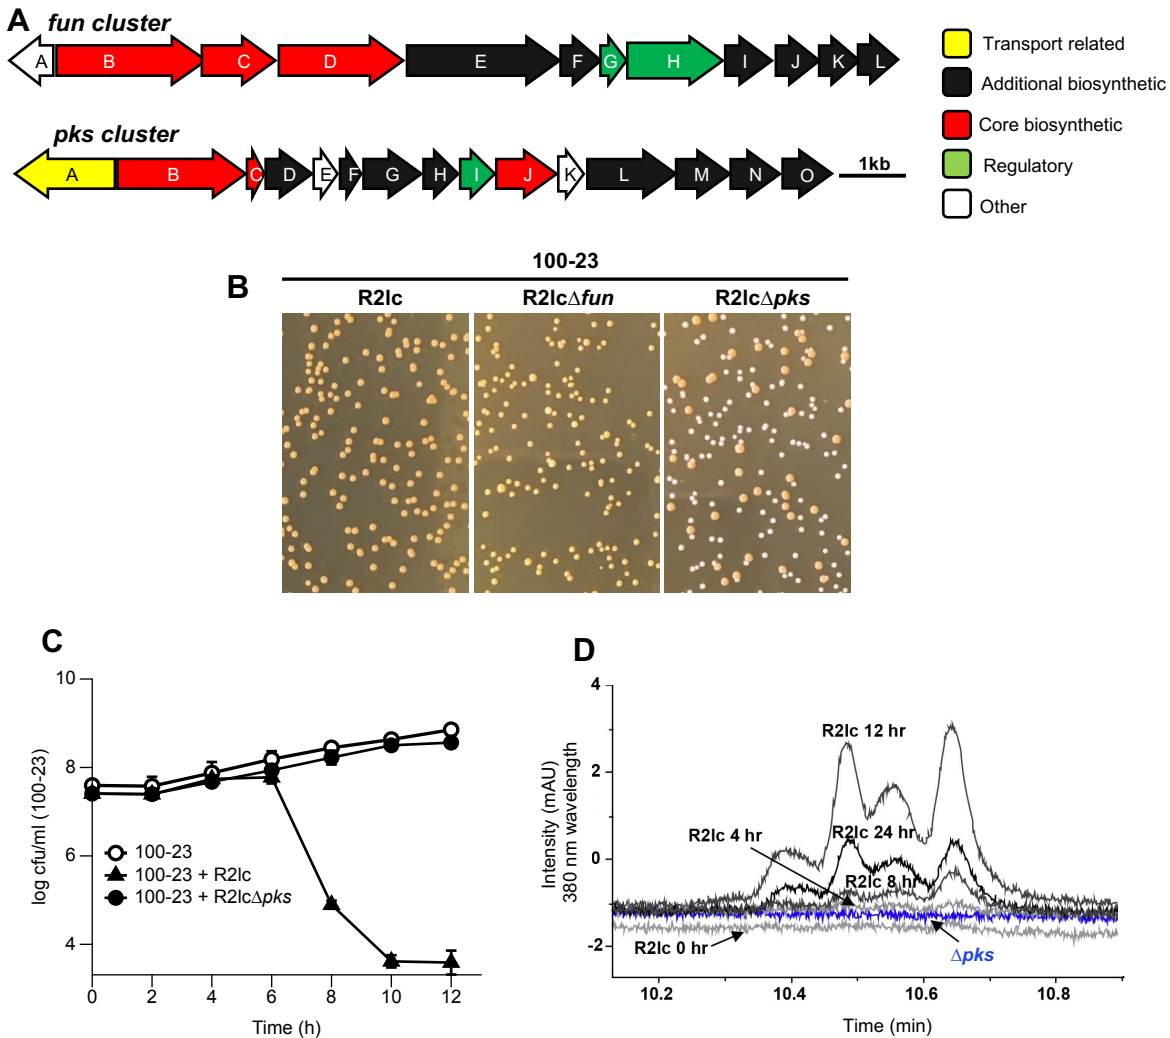

108

109 **Figure 1. A polyketide synthase cluster in *L. reuteri* R2lc produces polyene-like compounds**

110 **and provides competitive advantage A) The *fun* cluster (top) spans 13.4 kb containing 12 Open**

111 **Reading Frames (ORFs), and the *pks* cluster (bottom) spans 11.3 kb containing 15 ORFs.**

112 **Transport-related, additional biosynthetic, regulatory, and other genes are represented by**

113 **different colors. B) R2lc and R2lc $\Delta$ *fun* but not R2lc $\Delta$ *pks* inhibits *L. reuteri* 100-23. C) R2lc has**

114 **bactericidal effect against 100-23. Single culture (OD<sub>600</sub>=0.1) or co-cultures (OD<sub>600</sub>=0.05 from**

115 **each strain) were mixed and incubated in MRS broth (pH: 4.0, 37°C) and samples were collected**

116 every two hours for up to 12 hours. The data represents the average of three independent  
117 experiments. Error bars represents standard deviation. **D)** UPLC-PDA-MS analysis of R2lc and  
118  $\Delta pks$  mutant. R2lc but not  $\Delta pks$  produces unique compounds with a maximum absorption of  
119 380nm (Black: R2lc, blue:  $\Delta pks$ ). See also Figure s3.

120

### 121 ***L. reuteri* Pks has a time-dependent bactericidal effect**

122 To understand the dynamics by which R2lc outcompetes 100-23, we performed a time  
123 course competition experiment in batch cultures. Mixtures (1:1, OD<sub>600</sub> = 0.05 per strain) were  
124 prepared of R2lc + 100-23, and R2lc $\Delta pks$  + 100-23. As a control, a monoculture of 100-23 was  
125 grown. We harvested samples every two hours and determined the CFU levels. Up to six hours,  
126 mixtures of R2lc + 100-23 and R2lc $\Delta pks$  + 100-23 yielded similar levels of 100-23 colonies,  
127 which were comparable to the levels obtained when 100-23 was cultured independently.  
128 However, after eight and ten hours of co-incubation of R2lc + 100-23, 100-23 CFU levels were  
129 reduced by three and five orders of magnitude, respectively, while 100-23 continued to grow in  
130 the R2lc $\Delta pks$  + 100-23 mixture (Figure 1C). Importantly, the sharp decline in 100-23 CFU  
131 counts suggests Pks elicits a strong bactericidal activity against 100-23. Also, the fact that killing  
132 of 100-23 is initiated after 6-hours of co-culture suggests that production of Pks may be growth  
133 phase dependent.

134 In mice, *L. reuteri*—including strain 100-23—form a biofilm on the stratified squamous  
135 epithelium of the forestomach (Frese et al., 2013; Lin et al., 2018; Savage et al., 1968). Cell  
136 numbers of 100-23, R2lc or R2lc $\Delta pks$  in gastric biofilms were similar ( $4.3 \times 10^8 \pm 2.6 \times 10^8$ ,  
137  $2.0 \times 10^8 \pm 3.0 \times 10^7$ ,  $1.7 \times 10^8 \pm 4.1 \times 10^7$  CFU/ml, respectively) (Figure s2A). In biofilm co-  
138 cultures, however, R2lc was 750-fold more abundant than 100-23 ( $P = 0.002$ ). The ability of

139 R2lc to outcompete 100-23 in biofilm is mediated by Pks, because co-incubation of R2lc $\Delta pks$   
140 with 100-23 recovered similar levels of CFUs for both strains ( $P = 0.27$ ) (Figure s2B).

141

### 142 ***L. reuteri* pks cluster produces unique polyene-like compounds**

143 To gain more insight into *L. reuteri* R2lc Pks production *in vitro*, we performed Ultra  
144 Performance Liquid Chromatography coupled with Photodiode Array and Mass Spectrometer  
145 (UPLC-PDA-MS) analysis. By comparing the chromatograms obtained from R2lc and R2lc $\Delta pks$   
146 cultures, we found that R2lc produces a family of unique compounds with a maximum  
147 wavelength of 380 nm. These compounds eluted towards the end of the gradient run where the  
148 solvent composition was close to 100% methanol, indicating a hydrophobic characteristic. The  
149 large retention time of the compounds on the C18 column and the maximum absorption  
150 wavelength are consistent with previously identified polyene compounds (Gruber and Steglich,  
151 2007). Therefore, the putative products of the *pks* cluster are predicted to be polyene compounds.

152 The UV chromatogram extracted from the R2lc culture at different time points shows an  
153 increase in the production of these compounds up to 12 hours of incubation, after which the  
154 intensity reduces as shown in samples at 24 hours (Figure 1D). We subsequently analyzed the  
155 Liquid Chromatography-Mass Spectrometry (LC-MS) data of R2lc and  $\Delta pks$  samples collected  
156 above to identify the polyene products produced by R2lc. The mass spectrum of the peak  
157 between 10.52 min – 10.58 min in the R2lc chromatogram at 12 hours clearly showed an ion  
158 with  $m/z$   $[M+H]^+$  value of 257.1172 and corresponding  $m/z$   $[M+Na]^+$  value of 279.0092, which  
159 were absent in the 12-hour culture of  $\Delta pks$  (Figure s3). The high-resolution mass for the  
160 compound led to the predicted molecular formula of  $C_{16}H_{16}O_3$ . The reduction of Pks compounds  
161 after 12 hours of incubation suggests instability of Pks molecules in our experimental setup.



162 Taken together, these data suggest that antibacterial compounds are released in a time-dependent  
163 manner.

164

### 165 *L. reuteri* Pks molecules provide a competitive advantage *in vivo*

166 To characterize the ecological role of the *pks* antibacterial secondary metabolite gene  
167 cluster *in vivo*, we gavaged germ-free mice (n=4/group) with a 1:1 mixture of R2lc+100-23, or  
168 R2lc $\Delta$ *pks*+100-23. To quantify each strain in the fecal material, we engineered R2lc and its  
169 derivatives to encode chloramphenicol resistance (R2lc::*Cm* and R2lc $\Delta$ *pks*::*Cm*) while strain  
170 100-23 was rifampicin-resistant (100-23—Rif<sup>R</sup>). We determined the competition ratio between  
171 R2lc and 100-23 (competition ratio: R2lc CFU count/competitor strain's CFU count) over a  
172 period of six days in feces. We found that *L. reuteri* R2lc wild-type but not the  $\Delta$ *pks* mutant  
173 gradually outcompetes the 100-23 strain. The R2lc:100-23 competition ratio increased from  
174 107:1 (day 1) up to 980:1 (day 6), while the competition ratio between R2lc $\Delta$ *pks*:100-23  
175 declined from 35:1 (day 1) to 4:1 (day 6) (Figure 2A). Similarly, the R2lc:100-23 competition  
176 ratio was higher than the R2lc $\Delta$ *pks*:100-23 competition ratio in the forestomach (31,973-fold vs  
177 7,8-fold,  $P = 0.03$ ), cecum (1,515-fold vs. 2.9-fold,  $P = 0.03$ ), colon (1,474-fold vs. 8.9-fold,  $P =$   
178 0.03) and jejunum (1,114-fold vs. 5.2-fold,  $P = 0.03$ ) (Figure 2B). Thus, our findings  
179 demonstrate that Pks provides *L. reuteri* R2lc with a competitive advantage throughout the  
180 murine intestinal tract.

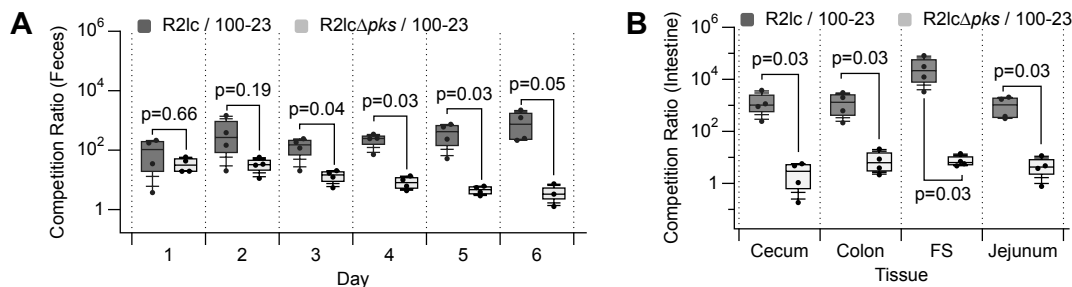

181

182 **Figure 2. *L. reuteri* Pks molecules provide a competitive advantage *in vivo*.**

183 A 1:1 mixture of R2lc+100-23, or R2lc $\Delta$ pks+100-23 was administered by oral gavage to germ-  
184 free mice. **A)** Competition ratios of the indicated strains in fecal and **B)** intestinal content (day 6)  
185 were determined. In box and whisker plots, the whiskers represent the maximum and minimal  
186 values, and the lower, middle and upper line of the box represent first quartile, median and third  
187 quartile, respectively. Circles represent data from individual mouse. Statistical significance was  
188 determined by Wilcoxon / Kruskal-Wallis Tests  $p < 0.05$  considered as significant.  $p = P$  value.  
189 F.S.: Forestomach.

190

191 ***L. reuteri* Pks-mediated antimicrobial effect is strain specific**

192 Now we established that *L. reuteri* Pks provides an *in vivo* and *in vitro* competitive  
193 advantage against strain 100-23, we next investigated to what extent Pks-mediated killing is  
194 strain specific. We performed *in vitro* competition experiments with 51 *L. reuteri* gut isolates  
195 from different host origins: human, rat, mouse, chicken and pig. To quantify strains, we used  
196 derivatives of R2lc and R2lc $\Delta$ pks that were engineered to be chloramphenicol resistant. For each  
197 competitor strain we isolated a natural rifampicin-resistant mutant. Strain R2lc and the  
198 competitor strain were mixed 1:1 in MRS medium adjusted to pH 4.0, which is pH of the  
199 forestomach, the natural habitat of strain R2lc. The co-cultures were incubated for 24 hours, and  
200 appropriate dilutions were plated on MRS plates containing chloramphenicol (5  $\mu$ g/ml, for R2lc  
201 and R2lc $\Delta$ pks) or rifampicin (25  $\mu$ g/ml, for competitor strain). Competition ratios were  
202 determined after 24 hours of incubation.

203 Based on non-parametric statistical tests, we identified that R2lc inhibits 41 out of 51  
204 (80.4%) *L. reuteri* strains. Specifically, six out of nine (66.6%) rat-isolates, seven out of ten

205 (70%) mouse isolates, 16 out of 18 (89%) pig isolates, eight out of nine (88.9%) chicken isolates  
 206 and two out of five (40%) human isolates were significantly inhibited by R2lc (R2lc vs  
 207 competitor CFU,  $P < 0.05$ ). To test if the competitive advantage of R2lc is driven by Pks, we  
 208 repeated the competition experiments with R2lc $\Delta$ pks. We found that deletion of the *pks* cluster  
 209 resulted in loss of antimicrobial activity and the  $\Delta$ pks mutant did not show strong inhibition  
 210 against competitor strains. However,  $\Delta$ pks mutant still inhibited some competitor strains (16 out  
 211 of 51) to a small extent, with observed differences in Colony Forming Units (CFUs) between  
 212  $\Delta$ pks and competitor strains less than two orders of magnitude (Figure 3). These data  
 213 demonstrate that R2lc-Pks mediated antimicrobial effect is strain specific and 10 out of 51 tested  
 214 *L. reuteri* strains (19.6%) are not inhibited/outcompeted by the Pks producing strain.

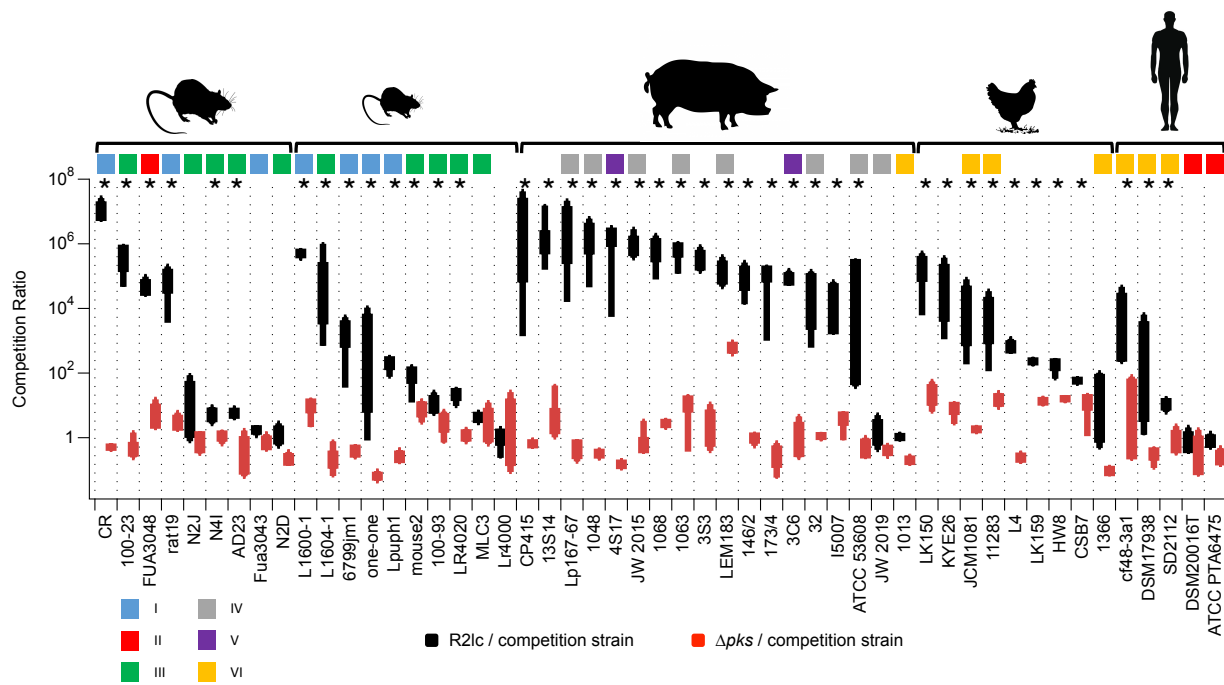

215  
 216 **Figure 3. *In vitro* competition ratio of *L. reuteri* R2lc and R2lc $\Delta$ pks with a panel of 51**  
 217 ***L. reuteri* strains from different host origin.** Competition ratios between R2lc and the  
 218 competitor strain (black) and R2lc $\Delta$ pks and the competitor strain (red) after 24h co-incubation in  
 219 MRS (pH 4.0). Data shown are based on at least three biological replicates. The whiskers

220 represent the maximum and minimal values, and the lower, middle and upper line of the box  
221 represent first quartile, median and third quartile, respectively. Host origin (top) and the *L.*  
222 *reuteri* phylogenetic lineage (color coding) are indicated. Statistical significance was determined  
223 by Wilcoxon / Kruskal-Wallis Tests. Asterisks (\*) represents statistical significance between  
224 R2lc vs competitor strain for the top panel ( $p < 0.05$  considered as significant). See also Table S3.  
225

### 226 ***L. reuteri* strains resistant to Pks encode an acyltransferase enzyme**

227         Next, we aimed to understand what the underlying mechanism is that allows select strains  
228 to be resistant to *L. reuteri* R2lc Pks. We performed comparative genome analyses to identify  
229 genes unique to strains that are resistant to *L. reuteri* R2lc Pks. We included 24 genome  
230 sequences in our analyses, of which four genome sequences were derived from resistant strains  
231 (*mlc3*, Lr4000, 6475 and 20016<sup>T</sup>) (Table S1). Our initial genome comparison analyses revealed  
232 eight genes unique to three of the four R2lc-resistant strains (*mlc3*, 6475 and 20016<sup>T</sup>) (Table S2).

233         One of the eight unique genes (*act*, Lreu\_1368 in strain DSM20016<sup>T</sup>, Table S2) is  
234 annotated as an O-acyltransferase. This gene became our focus as several studies demonstrated  
235 that deletion of homologous *act* genes reduces the resistance to enzymes that target the  
236 peptidoglycan cell wall in other Gram-positive bacteria (reviewed in (Ragland and Criss, 2017)).  
237 Moreover, resistance to antimicrobial molecules is typically associated with altered cell-wall  
238 peptidoglycan structures (Vollmer, 2008). In *L. reuteri*, the *act* gene is located in the surface  
239 polysaccharide (SPS) gene cluster. Based on the available genome sequences, we found that  
240 three resistant strains (*mlc3*, 6475 and 20016<sup>T</sup>) all putatively encode a nearly identical Act  
241 protein ( $\geq 99\%$  amino acid identity). Three R2lc-Pks-sensitive strains (CR, ATCC 53608 and  
242 one-one) putatively encode a distinct Act protein with 54% amino acid identity to the predicted

243 Act amino acid sequence of resistant *L. reuteri* strains. Six additional R2lc-Pks-sensitive strains  
244 (I5007, 6799jm-1, lpup, CF48-3A1, Lr4020 and SD2112) putatively encode Act with 26-28%  
245 amino acid identity compared to the predicted Act amino acid sequence of resistant *L. reuteri*  
246 strains. The remainder of the 12 strains that are sensitive to R2lc-Pks do not contain the *act* gene  
247 in the SPS gene cluster (Figure 4).

248

249

250

251

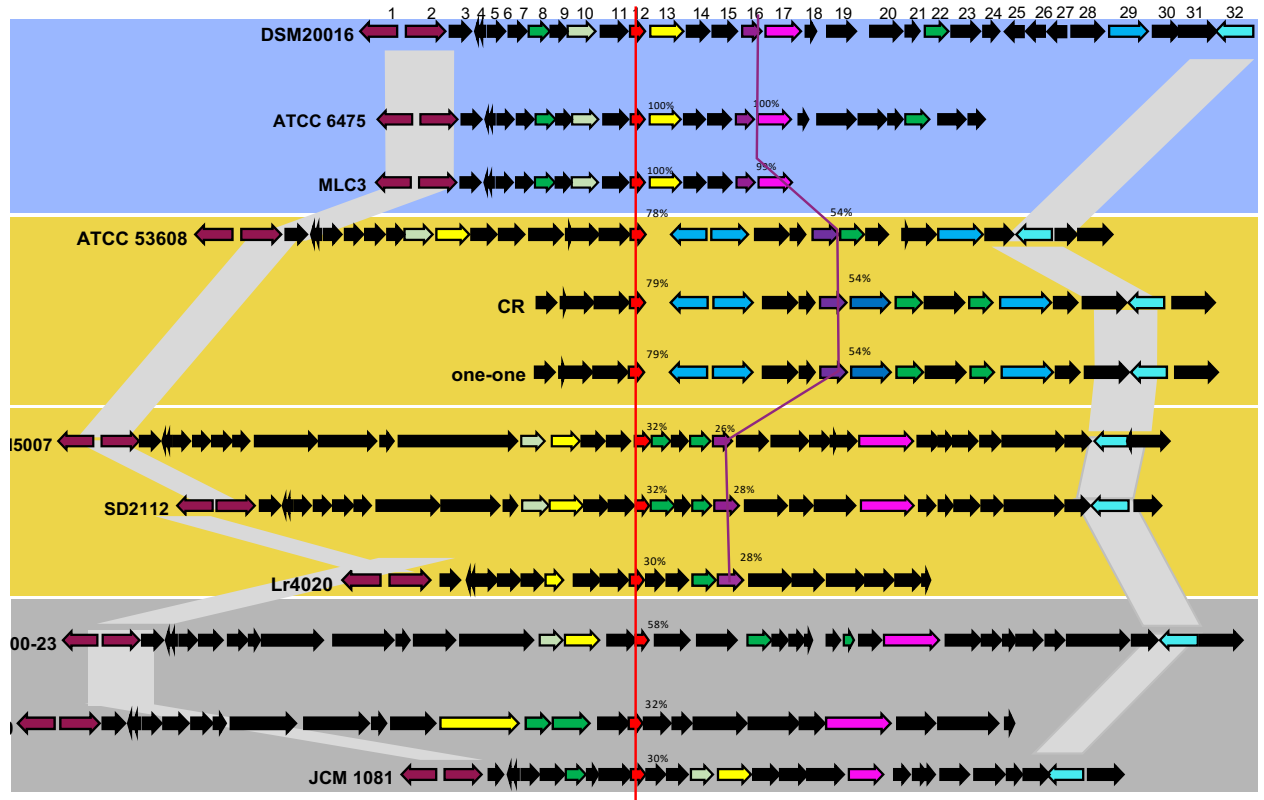

■ UDP-galactopyranose mutase    ■ Acyltransferase    ■ Membrane protein involved in the export of O-antigen and teichoic acid  
■ Transporter  
■ transcription attenuator

- |                                                                                                                                                                                                                                                                                                                                                                                                                                                                                                                                                                                                                                                                  |                                                                                                                                                                                                                                                                                                                                                                                                                                                                                                                                                                                                                                                                      |
|------------------------------------------------------------------------------------------------------------------------------------------------------------------------------------------------------------------------------------------------------------------------------------------------------------------------------------------------------------------------------------------------------------------------------------------------------------------------------------------------------------------------------------------------------------------------------------------------------------------------------------------------------------------|----------------------------------------------------------------------------------------------------------------------------------------------------------------------------------------------------------------------------------------------------------------------------------------------------------------------------------------------------------------------------------------------------------------------------------------------------------------------------------------------------------------------------------------------------------------------------------------------------------------------------------------------------------------------|
| <ul style="list-style-type: none"> <li>· Arginine:ornithine antiporter, APA family</li> <li>· Amino acid/polyamine/organocation transporter, APC superfamily</li> <li>· Putative ribonuclease</li> <li>· Hypothetical protein</li> <li>· Hypothetical protein</li> <li>· Regulatory protein RecX</li> <li>· Hypothetical protein</li> <li>· Glycosyl transferase, family 2</li> <li>· Undecaprenyl-phosphate galactose phosphotransferase</li> <li>0. UDP-galactopyranose mutase</li> <li>1. Hypothetical protein</li> <li>2. Lipopolysaccharide biosynthesis protein</li> <li>3. Membrane protein involved in the export of O-antigen, teichoic acid</li> </ul> | <ul style="list-style-type: none"> <li>17. Mannosyl-glycoprotein endo-beta-N-acetylglucosamidase</li> <li>18. Transposase IS200-family protein</li> <li>19. N-acetylmuramoyl-L-alanine amidase, family 2</li> <li>20. NLP/P60 protein</li> <li>21. Hypothetical protein</li> <li>22. Glycosyl transferase, family 2</li> <li>23. Integrase, catalytic region</li> <li>24. stB domain protein ATP-binding protein</li> <li>25. Transposase InsO</li> <li>26. Hypothetical protein</li> <li>27. Transposase and inactivated derivatives IS30</li> <li>28. Hypothetical protein</li> <li>29. Dextranucrase</li> <li>30. Protein of unknown function LIPF0118</li> </ul> |
|------------------------------------------------------------------------------------------------------------------------------------------------------------------------------------------------------------------------------------------------------------------------------------------------------------------------------------------------------------------------------------------------------------------------------------------------------------------------------------------------------------------------------------------------------------------------------------------------------------------------------------------------------------------|----------------------------------------------------------------------------------------------------------------------------------------------------------------------------------------------------------------------------------------------------------------------------------------------------------------------------------------------------------------------------------------------------------------------------------------------------------------------------------------------------------------------------------------------------------------------------------------------------------------------------------------------------------------------|

252

253 **Figure 4. Variability in gene content of Surface Polysaccharide gene cluster in *L. reuteri*.**

254 Comparison of surface polysaccharide (SPS) gene clusters of strains resistant and sensitive to

255 R2lc-Pks. Strains #1-3 (resistant) each putatively encode a nearly identical Act protein with

256  $\geq 99\%$  amino acid identity; strains #4-6 (sensitive) putatively encode Act that shares 54% amino

257 acid identity to Act of resistant strains; strains #7-9 (sensitive) putatively encode Act that shares

258 25-28% amino acid identity to Act of resistant strains; strains #10-12 (sensitive) lack the *act*  
259 gene. Genes are color-coded with their predicted functions based on the annotation of the SPS  
260 gene cluster in *L. reuteri* DSM20016<sup>T</sup>. See also Table S1 and Table S2.

261  
262 To map which *L. reuteri* strains are resistant or sensitive to R2lc-Pks, we constructed a  
263 phylogenetic tree of Act amino acid sequences from 133 *L. reuteri* strains. We found that 43 out  
264 of 133 strains (32.3%) contain an *act* gene whose putative product shares 99-100 amino acid  
265 identity to the predicted amino acid sequence of resistant *L. reuteri* strains, while the remaining  
266 strains putatively encode Act with 23-72% amino acid identity (Figure 5). Also see Table S6.





272 predicted to be R2lc-resistant (blue ring). The remaining strains encode an *act* gene that shares  
273 23-54% amino acid identity with the *act* gene in PTA 6475 (yellow ring). See also Table S6.

274  
275 **The acyltransferase gene in *L. reuteri* confers protection to R2lc-Pks products**

276 To test if the *act* gene confers protection to R2lc-Pks products, we generated *act* mutants  
277 in three *L. reuteri* strains: *mlc3* (rat isolate, clade I), ATCC 6475 (human isolate, clade I), and  
278 DSM17938 (human isolate, clade III). In each of these strains, inactivation of *act* increased the  
279 sensitivity to R2lc-Pks, as is evident from the increased competition ratios between R2lc vs  $\Delta act$   
280 compared to the competition ratios between R2lc vs wild-type strain (Figure 6A). In contrast, the  
281 competition ratios between R2lc $\Delta pks$  vs *L. reuteri*  $\Delta act$  strains are across the board lower  
282 compared to the competition ratios of R2lc vs  $\Delta act$  strains (Figure 6B). Overall, our data showed  
283 that the *act* gene in *L. reuteri* confers protection to R2lc-Pks products.

284

285 ***L. reuteri* Act provides resistance against antimicrobial Pks molecules *in vivo***

286 To determine to what extent the *act* gene protects against R2lc Pks *in vivo*, we performed  
287 competition experiments in mice. Germ-free mice were administered with a 1:1 mixture of any  
288 of the following strain combinations: R2lc  $\pm pks$  and *mlc3*  $\pm act$  (Figure 6BC). Following  
289 administration, fecal samples were analyzed at day one, three and six, and animals were  
290 sacrificed at day 7 after which we analyzed microbial counts in the stomach, jejunum, cecum and  
291 colon. Fecal analyses revealed that the competition ratios between R2lc and *mlc3* or its isogenic  
292  $\Delta act$  mutant were comparable ( $P > 0.05$ ); however, at day 7, the competition ratio of  
293 R2lc:*mlc3* $\Delta act$  was significantly larger compared to R2lc:*mlc3* ( $2,183 \pm 3,060$ -fold vs  $95 \pm$   
294  $58$ -fold, respectively;  $P < 0.01$ ). We also observed that in all intestinal tissues the competition  
295 ratio of R2lc::*mlc3* $\Delta act$  was larger compared to R2lc::*mlc3*. Specifically, forestomach ( $3,777 \pm$

296 2,259-fold vs  $31 \pm 48$ -fold;  $P < 0.01$ ), jejunum ( $9,510 \pm 15,239$ -fold vs  $62 \pm 55$ -fold;  $P < 0.01$ ),  
297 cecum ( $9,872 \pm 17,683$ -fold vs  $115 \pm 99$ -fold;  $P < 0.01$ ), colon ( $959 \pm 4,703$ -fold vs  $118 \pm$   
298  $104$ -fold;  $P < 0.01$ ). Thus, the *act* gene provides protection against R2lc-Pks *in vivo*. To test to  
299 what extent R2lc Pks provides R2lc with a competitive advantage in these experiments, we  
300 performed competition experiments with R2lc $\Delta$ *pks*::*mlc3* and R2lc $\Delta$ *pks*::*mlc3* $\Delta$ *act* (Figure 6C).  
301 Overall, the competition ratios of R2lc $\Delta$ *pks*::*mlc3* and R2lc $\Delta$ *pks*::*mlc3* $\Delta$ *act* are lower compared  
302 to the competition ratios observed with R2lc wild-type, which demonstrates a clear role for Pks  
303 in providing R2lc with a competitive advantage *in vivo*. Interestingly, the R2lc $\Delta$ *pks*::*mlc3* $\Delta$ *act*  
304 competition ratio is higher than that of R2lc $\Delta$ *pks*::*mlc3* in the stomach (1.5-fold vs 0.5-fold,  $P =$   
305  $0.02$ ), jejunum (2.2-fold vs 0.5-fold,  $P = 0.01$ ) and cecum (2.2-fold vs 1.2-fold,  $P = 0.04$ )  
306 (Figure 6C) which might be due to the role of *act* gene in lysozyme resistance during *in vivo*  
307 colonization.

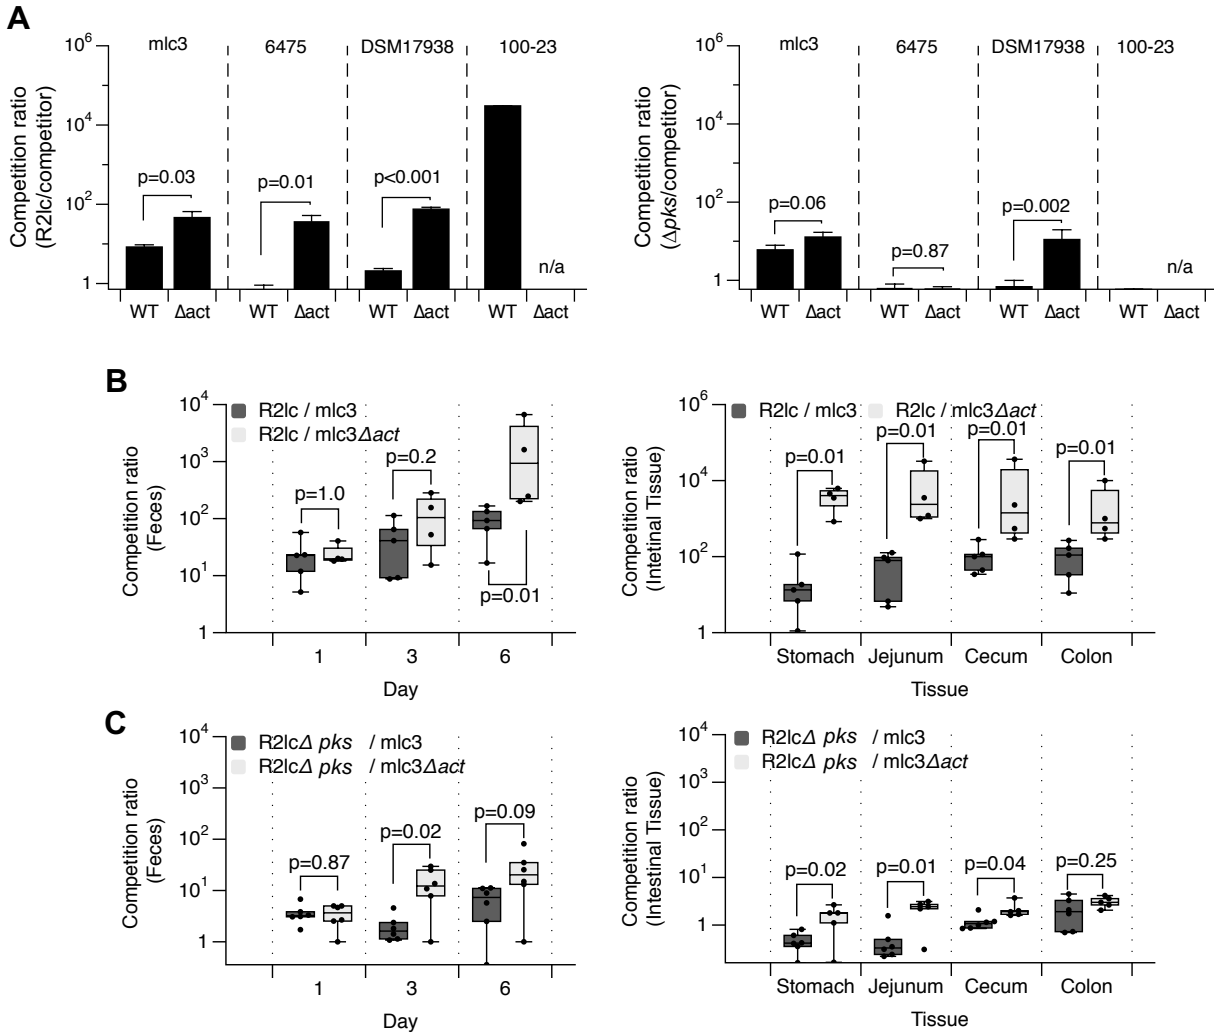

308

309 **Figure 6. The *act* acyltransferase gene protects against R2lc-Pks molecules.** A) Act provides

310 resistance to R2lc-mediated killing (left panel), which is mediated by the inhibitory activity of an

311 intact Pks (right panel). **B and C)** Competition ratios of the indicated strains in the previous

312 germ-free mice in fecal (left panel) and intestinal contents (right panels). When data are

313 presented as box and whisker plots, the whiskers represent the maximum and minimal values,

314 and the lower, middle and upper line of the box represent first quartile, median and third quartile,

315 respectively. Points represent individual data points. Statistical significance was determined by

316 Wilcoxon / Kruskal-Wallis Tests,  $p=P$  value.  $P<0.05$  considered significant.

317

## 318 The acyltransferase gene increases peptidoglycan acetylation

319 The bacterial Act enzyme acetylates the C6 hydroxyl of *N*-acylmuramic acid in  
320 peptidoglycan (PG) (Moynihan and Clarke, 2010). To understand the role of *act* gene on *L.*  
321 *reuteri* peptidoglycan acetylation, we performed HPLC analyses to determine PG acetylation  
322 levels in Pks-resistant and -sensitive strains, relative to total cellular muramic acid (MurN)  
323 content. Analysis of cell wall extracts derived from *L. reuteri* 100-23, a Pks-sensitive strain  
324 which does not encode Act, revealed that  $6.65 \pm 1.19\%$  was acetylated relative to total MurN.  
325 Next, we cloned the *act* gene from strain *mlc3* in the inducible expression vector pSIP411, which  
326 was established in strain 100-23. Induced expression of *act* in 100-23 increased the relative  
327 peptidoglycan acetylation to  $28.7 \pm 9.0\%$ . Inactivation of *act* in *L. reuteri* strains resistant to  
328 R2lc-Pks reduced peptidoglycan acetylation levels: from  $70.1 \pm 4.9\%$  to  $2.3 \pm 0.3\%$  for *mlc3*;  
329 and from  $61.2 \pm 9.1\%$  to  $21.3 \pm 12.9\%$  for 6475). Overexpression, of *act* gene in *mlc3* $\Delta$ *act* and  
330 6475 $\Delta$ *act* restored the relative PG acetylation (from  $2.3 \pm 0.3\%$  to  $51.8 \pm 15.1\%$  for  
331 *mlc3* $\Delta$ *act*::*act* ; and from  $21.3 \pm 12.9\%$  to  $50.9 \pm 9.2\%$  for 6475 $\Delta$ *act*::*act*) (Table 1). Together  
332 these data suggests that *act* gene in *L. reuteri* is responsible for increased peptidoglycan  
333 acetylation, which is linked to the resistance to antimicrobial polyketides produced by R2lc.

334  
335 **Table 1.** O-acetylation levels were determined by base-catalyzed hydrolysis and release of  
336 acetate. Percent O-acetylation is reported relative to muramic acid (MurN) content.

| Strain                                         | % O-acetylation   |
|------------------------------------------------|-------------------|
| 100-23                                         | $6.65 \pm 1.19$   |
| 100-23 + pSIP control                          | $3.46 \pm 0.07$   |
| 100-23:: <i>act</i>                            | $28.70 \pm 9.01$  |
| <i>mlc3</i>                                    | $70.12 \pm 4.85$  |
| <i>mlc3</i> $\Delta$ <i>act</i> + pSIP control | $2.31 \pm 0.29$   |
| <i>mlc3</i> $\Delta$ <i>act</i> :: <i>act</i>  | $51.76 \pm 15.09$ |
| 6475                                           | $61.21 \pm 9.07$  |
| 6475 $\Delta$ <i>act</i> + pSIP control        | $21.29 \pm 12.92$ |
| 6475 $\Delta$ <i>act</i> :: <i>act</i>         | $50.90 \pm 9.18$  |

337 <sup>a</sup> Results are from one representative biological replicate measured in triplicate and reported as  
338 mean with Standard Deviation.

339

## 340 **Discussion**

341           In this study, we provide mechanistic insight into intra-species antagonism based on a  
342 secondary metabolite in the gut symbiont *L. reuteri*. We discovered that a biosynthetic gene  
343 cluster (BGC) provides a competitive advantage in the gastrointestinal tract by killing closely  
344 related microbes in a strain-specific manner. Expression of the peptidoglycan acetylating enzyme  
345 Act by select strains of *L. reuteri* provides protection against this killing activity.

346           Closely related strains that occupy the same niche are subject to fierce competition  
347 (Hibbing et al., 2010). While the co-existence of two closely related strains may be stable in the  
348 host, long-term evolution may lead to different ecological outcomes (Edwards et al., 2018).  
349 Either evolution leads to changes that form a more stable population—lineages are overall less  
350 competitive—or evolution results in increased fitness of one lineage. The lineage with increased  
351 fitness will replace the competing lineage, or the competing lineage may evolve in a way that  
352 will allow it to persist (Le Gac et al., 2012). Our findings are interesting in light of these  
353 ecological theories. Specifically, four distinct lineages have thus far been identified among  
354 rodent *L. reuteri* isolates (Frese et al., 2011). Our competition analyses revealed that nearly all  
355 strains in lineage I are sensitive to R2lc-Pks products while most strains in lineage III are  
356 resistant. One potential explanation for the latter is the broad distribution of nearly identical *act*  
357 genes in *L. reuteri* strains from different host origin (Figure 5, blue ring), which suggests *act*  
358 exerts an evolutionary pressure that will increase the fitness in the gut ecosystem. The findings  
359 presented in this work, the observation that aryl polyene gene clusters are widely distributed  
360 throughout the host-associated bacteria (Cimermanic et al., 2014), and that *L. reuteri* 6475 $\Delta act$   
361 has reduced gastrointestinal survival (preliminary data) support the importance of Act in gut

362 fitness and make it collectively less likely that *act* is acquired through a neutral process such as  
363 genetic drift.

364         The evolution of a vertebrate symbiont with its host might be reciprocal, resulting in co-  
365 evolution. The beneficial traits that a microbe exerts on its host may have been shaped by natural  
366 selection as they promote host fitness, which is critical for the microbe to thrive in its niche.  
367 R2lc-Pks molecules activates the aryl-hydrocarbon receptor (AhR), a ligand activated  
368 transcription factor (Özçam et al., 2019). Activation of AhR has been shown to induce  
369 production of interleukin-22 (IL-22) (Veldhoen et al., 2008), which enhances the innate immune  
370 response by inducing antimicrobial peptides (i.e. Reg3-lectins) production from the mucosal  
371 layer (Vaishnava et al., 2011; Zheng et al., 2008). It is intriguing to speculate that Pks molecules  
372 provide R2lc with additional, host-mediated competitive advantage by killing competitors, which  
373 may be aided by Pks-mediated AhR activation that leads to antimicrobial peptide production by  
374 the host. Collectively, this would support the coevolution between select microbes and their host.

375         This work contributes to our understanding of the ecological role of a gut symbiont-  
376 encoded secondary metabolite and provides mechanistic insight into how closely related strains  
377 developed resistance against these antimicrobial molecules by acetylation of the cell-wall  
378 peptidoglycan. It is plausible bacteria have evolved other mechanisms to survive exposure to  
379 Pks. In this work, we did encounter one strain—the rodent isolate Lr4000—that does not encode  
380 Act but was resistant to R2lc Pks molecules during the batch culture competition experiments  
381 and the mechanism of resistance remains to be elucidated.

382         With a number of genome editing tools available for *L. reuteri*, we are in a position to use  
383 genetic approaches to study microbe-microbe interactions in a gut symbiont. When these  
384 experiments are placed in the right ecological context, mechanistic insight can be provided on

385 the formation and stability of microbial communities, which is expected to provide insight how  
386 microbial diversity is maintained within complex ecosystems. This knowledge can be leveraged  
387 to provide rational approaches to select probiotics and next-generation probiotics to ultimately  
388 promote animal and human health.

389 **ACKNOWLEDGEMENTS**

390 We thank Siv Ahrné (Lund University, Sweden) for providing *L. reuteri* R21c, N2J, N2D,  
391 and N4I, BioGaia AB (Stockholm, Sweden) for providing *L. reuteri* strains ATCC PTA 6475, and  
392 Joseph Skarlupka for technical assistance. We are grateful to the College of Agricultural Life  
393 Sciences (CALs) Statistical Consulting Lab for their assistance in the statistical analysis. This  
394 work was supported by startup funds from the University of Wisconsin-Madison to J.P.V.P., the  
395 UW-Madison Food Research Institute, and the United States Department of Agriculture, National  
396 Institute of Food and Agriculture (USDA NIFA) Hatch award MSN185615 and grant no. 2018-  
397 6717-27523. M.Ö. received financial support from the Turkish Ministry of National Education,  
398 from the Department of Food Science, and is the recipient of the Robert H. and Carol L. Deibel  
399 Distinguished Graduate Fellowship in Probiotic Research, which is awarded by the Food Research  
400 Institute (UW-Madison). J.C. is supported by National Institutes of Health grant R01 AI153173.  
401 Gnotobiotic work was partly supported by the Office of the Vice-Chancellor for Research and  
402 Graduate Education at the University of Wisconsin–Madison, with funding from the Wisconsin  
403 Alumni Research Foundation.

404

405 **AUTHOR CONTRIBUTIONS**

406 M.Ö. designed and performed the experiments, analyzed and interpreted the data, and  
407 wrote and revised the manuscript. J.-H.O., R.T., D.A., S.Z., C.C., E.V., performed experiments,  
408 provided technical support, S.R.R., J.S., performed experiments. T.B., J.C., J.W. shared resources  
409 contributed to data interpretation and revised the manuscript; J.P.v.P. secured funding, conceived,  
410 designed, and supervised the study, and critically revised the manuscript.

411



412 **DECLARATION OF INTEREST**

413 JPVP received unrestricted funds from BioGaia, AB, a probiotic-producing company.  
414 JPVP is the founder of the consulting company Next-Gen Probiotics, LLC. JW has received  
415 grants and honoraria from several food and ingredient companies, including companies that  
416 produce probiotics. JW is a co-owner of Synbiotic Solutions, LLC, and is on the Scientific  
417 Advisory Board of Alimentary Health. M.Ö. was an employee of DuPont Nutrition and  
418 Biosciences. JC is a Scientific Advisor for Seed Health, Inc.

419

420 **STAR METHODS**

421 **RESOURCE AVAILABILITY**

422

423 **Lead contact**

424 Further information and requests for resources should be directed to and will be fulfilled by the  
425 Lead Contact, Jan-Peter van Pijkeren ([vanpijkeren@wisc.edu](mailto:vanpijkeren@wisc.edu)).

426

427 **Material Availability**

428 Requests for the plasmids and strains used in this study should be directed to and will be fulfilled  
429 by the Lead Contact, Jan-Peter van Pijkeren ([vanpijkeren@wisc.edu](mailto:vanpijkeren@wisc.edu)).

430

431 **Data and Code Availability**

432 Any additional information required to reanalyze the data reported in this paper is available from  
433 the lead contact upon request.

434

435

436 **KEY RESOURCE TABLE**

| REAGENT or RESOURCE                                       | SOURCE              | IDENTIFIER                       |
|-----------------------------------------------------------|---------------------|----------------------------------|
| <b>Bacterial strains</b>                                  |                     |                                  |
| See Table S3 for bacterial stains used in this study      |                     |                                  |
| <b>Chemicals</b>                                          |                     |                                  |
| Agar                                                      | Alfa                | Cat#A10752                       |
| Agarose                                                   | IBI                 | Cat# IB70042                     |
| LB broth                                                  | Acumedia, Neogen    | Cat# 7290A                       |
| MRS broth                                                 | BD                  | Cat# 288110                      |
| M17 broth                                                 | BD                  | Cat# 218561                      |
| Potassium Buffered Saline                                 | Gibco               | Cat# 14190-144                   |
| 0.45- $\mu\text{m}$ -pore-size cellulose acetate membrane | Sigma               | Product# WHA69012504             |
| Acetic acid standard solution                             | Fisher Scientific   | Cat# A38S-500                    |
| Sulfuric acid                                             | Fisher Scientific   | Cat# A300-500                    |
| Protease                                                  | Sigma               | Product# P5147                   |
| Magnesium sulfate                                         | Fisher Scientific   | Cat# M65-500                     |
| RNase A                                                   | Thermo Scientific   | Cat# EN0531                      |
| DNase I                                                   | Invitrogen          | Cat# 18068015                    |
| $\alpha$ -amylase                                         | Sigma               | Cat# 10065                       |
| Sodium chloride                                           | Fisher Scientific   | Cat# S271-500                    |
| Tris-HCl                                                  | Calbiochem          | Product# 648310-M                |
| Sodium dodecyl sulfate                                    | Sigma               | Product# L4509                   |
| 24-well plates                                            | Fisher Scientific   | Cat# 12556006                    |
| Agarose                                                   | DOT Scientific Inc. | Cat# DS170042                    |
| Pallet paint                                              | VWR International   | Cat# 9049-3                      |
| Chow diet                                                 | LabDiet             | Cat# 5201                        |
| DpnI                                                      | Fisher Scientific   | Cat# FERFD1704                   |
| 0.22 $\mu\text{m}$ filter, Polyvinylidene fluoride [PVDF] | Milipore            | Cat# SLGVM33RS                   |
| Sodium hydroxide                                          | Fisher Chemical     | Cat# S318100                     |
| Methanol                                                  | Fisher Chemical     | Cat# A456-500                    |
| Formic acid                                               | Fisher Chemical     | Cat# A11350                      |
| Chloramphenicol                                           | Dot Scientific      | Cat# DSC61000-25                 |
| Erythromycin                                              | Fisher Scientific   | Cat# BP920-25                    |
| Rifampicin                                                | TCI Chemicals       | R0079-25G                        |
| Vancomycin                                                | Chem-Impex          | Cat# 00315                       |
| Ethanol                                                   | KOPTEC              | Cat# V1016                       |
| P <sub>sak</sub> Induction peptide                        | Peptide2.0          | Sequence:<br>MAGNSSNFIHKIKQIFTHR |
| Choice Taq DNA polymerase master mix                      | Denville Scientific | Cat# CB4070-8                    |
| Phusion Hot Start polymerase II                           | Thermo Scientific   | Cat# F-549-L                     |
| T4 DNA ligase                                             | Thermo Scientific   | Cat# EL0011                      |
| Polynucleotide kinase                                     | Thermo Scientific   | Cat# EK0031                      |
| dATP                                                      | Promega             | Cat# U120A                       |
| Ampligase                                                 | Lucigen             | Cat# A32750                      |
| Sodium Hydroxide                                          | Fisher Scientific   | Cat# S318-500                    |

|                                               |                        |             |
|-----------------------------------------------|------------------------|-------------|
| HCl                                           | Ricca Chemical Company | Cat# 3440-1 |
| <b>Critical Commercial Assay Kits</b>         |                        |             |
| Qubit dsDNA quantification kit                | Invitrogen             | Cat# Q32853 |
| Genomic DNA purification kit                  | Promega                | Cat# A1120  |
| GeneJET PCR purification kit                  | Thermo Scientific      | Cat# K0701  |
| Plasmid isolation kit                         | Promega                | Cat# A9340  |
| <b>Experimental Models:</b>                   |                        |             |
| <b>Organisms/Strains</b>                      |                        |             |
| C57BL/6J, Male                                | Jackson Laboratory     | Cat# 000664 |
| <b>Oligonucleotides</b>                       |                        |             |
| See Table S4 for primers used for this study  |                        |             |
| <b>Recombinant DNA</b>                        |                        |             |
| See Table S5 for plasmids used for this study |                        |             |
| <b>Software and Algorithms</b>                |                        |             |
| JMP Pro                                       | SAS                    | Ver. 11.0.0 |
| Datagraph                                     | Visual Data Tolls Inc. | Ver. 4.2.1  |
| Bruker Hystar software                        | Bruker                 | Hystar 3.2. |
| MEGA                                          | (Kumar et al., 2018)   | Ver. 10.1.7 |

437

## 438 **EXPERIMENTAL MODEL AND SUBJECT DETAILS**

### 439 **Microbial Strains and Growth Conditions**

440           The strains and plasmids used in this study are listed in Table S3 and S5. *L. reuteri*  
441 strains were cultured in De Man Rogosa Sharpe (MRS) medium (Difco, BD BioSciences). For *in*  
442 *vitro* competition and biofilm formation experiments, we used filter-sterilized (0.22 µm PVDF  
443 filter, Millipore) MRS that was adjusted to pH 4.0 with 1 M HCl. Unless stated otherwise, we  
444 prepared bacterial cultures as follows: *L. reuteri* strains were incubated at 37°C under hypoxic  
445 conditions (5% CO<sub>2</sub>, 2% O<sub>2</sub>). The MRS agar plates were incubated for 24 hours for colony  
446 counting. *Escherichia coli* EC1000 was used as general cloning host and cultured with aeration  
447 at 37°C in lysogeny broth (LB, Teknova). *Lactococcus lactis* MG1363 harboring pJP042  
448 (VPL2047) was cultured under static condition at 30°C in M17 broth, which contains glucose  
449 (0.5% [w/v]). Electrocompetent *E. coli* EC1000 were prepared as described in (Sambrook and  
450 Russell, 2006). Electrocompetent *L. reuteri* cells were prepared as described in (Van Pijkeren

451 and Britton, 2012). If applicable, MRS for *L. reuteri* was supplemented with 5 µg/ml  
452 erythromycin, 5 µg/ml chloramphenicol or 25 µg/ml rifampicin.

453

#### 454 **Mice**

455

#### 456 **Ethics statement**

457 All mouse experiments were performed in accordance with NIH guidelines, Animal  
458 Welfare Act, and US federal law and were approved by the Application Review for Research  
459 Oversight at Wisconsin (ARROW) committee and overseen by the Institutional Animal Care and  
460 Use Committee (IACUC) under protocol ID M005149-RO1-A01. Conventional pathogen-free and  
461 germ-free mice were housed at Animal Science and Laboratory of Animal Research Facilities  
462 respectively at the University of Wisconsin-Madison.

463

#### 464 **Mice Strains and Husbandry**

465 Twelve-week-old germ-free male B6 mice (C57BL/6J) were maintained in a controlled  
466 environment in plastic flexible film gnotobiotic isolators with a 12 hours light cycle. Sterilized  
467 food (standard chow, LabDiet 5001, St Louis, MO) and water were provided *ad libitum*.

468

#### 469 **Reagents and Enzymes**

470 To amplify DNA fragments for cloning and screening, we used Phusion Hot Start DNA  
471 Polymerase II (Thermo Scientific) and Taq DNA polymerase (Denville Scientific), respectively.  
472 We used T4 DNA ligase (Thermo Scientific) for blunt-end ligations. If applicable, we treated  
473 column purified (Thermo Scientific) PCR products with DpnI (Thermo Scientific) to remove

474 plasmid template DNA. Phosphorylation of double stranded DNA fragments was performed with  
475 T4 Polynucleotide Kinase (Thermo Scientific). Ligase Cycling Reactions (LCR) were performed  
476 as described previously (Kok et al., 2014). Oligonucleotides and double-stranded DNA fragments  
477 were synthesized by Integrated DNA Technologies (IDT), and are listed in Table S2.

478

## 479 **METHOD DETAILS**

480

### 481 **Construction of *L. reuteri* mutant strains**

#### 482 **Construction of suicide shuttle vectors for homologous recombination**

483 To generate mutant strains in lactobacilli we used the counterselection plasmid pVPL3002  
484 (Zhang et al., 2018). To generate *L. reuteri* R2lc::*Cm*, R2lc $\Delta$ *pks*::*Cm*, mlc3 $\Delta$ *act* and  
485 DSM17938 $\Delta$ *act* 500-1000 bp upstream and downstream flanking regions of target genes were  
486 amplified by PCR (see Table S4 for oligonucleotides). We used following oligonucleotides;  
487 oVPL3113-3114 (upstream, R2lc::*Cm*), oVPL3115-3116 (downstream, R2lc::*Cm*), oVPL3194-  
488 3195 (upstream, mlc3 $\Delta$ *act*), oVPL3196-3197 (downstream, mlc3 $\Delta$ *act*), oVPL3237-oVPL3238  
489 (upstream, DSM17938 $\Delta$ *act*) and oVPL3239-oVPL3240 (downstream, DSM17938 $\Delta$ *act*).

490 Amplicons were purified (GeneJET PCR Purification Kit, Thermo Scientific). The  
491 pVPL3002 backbone was amplified with oVPL187-oVPL188, purified (GeneJET PCR  
492 Purification Kit, Thermo Scientific) and digested with DpnI. Purified amplicons were quantified  
493 (Qubit, Life Technologies). The amplicons were mixed at equimolar quantities (0.25 pmol),  
494 followed by phosphorylation, ethanol precipitation and LCR (Kok et al., 2014). Following LCR,  
495 DNA was precipitated with Pellet Paint co-precipitant (VWR International), resuspended in 5  $\mu$ l  
496 sterile water and transformed into electrocompetent *E. coli* EC1000 cells. By PCR, we screened

497 for insertion of our target sequences using oligonucleotides that flank the multiple cloning site  
498 (oVPL49-oVPL97). Finally, the integrity of deletion and insertion cassettes was determined by  
499 Sanger sequencing. The resultant constructs were named as follow; VPL31130 (contains the  
500 chloramphenicol insertion cassette for R2lc::*Cm* and R2lc $\Delta$ *pks*::*Cm*), VPL31079 (contains *act*  
501 deletion cassette for *mlc3*) and VPL31139 (contains *act* deletion cassette for DSM17938).

502

### 503 **Generating *L. reuteri* mutants by homologous recombination**

504 Three micrograms plasmid DNA was electroporated in electrocompetent *L. reuteri* cells.  
505 For R2lc::*Cm*, bacterial cells were plated on MRS agar containing 5  $\mu$ g/ml chloramphenicol,  
506 colonies were screened by PCR (oVPL3117-3118) to confirm double crossover event. For  
507 *mlc3* $\Delta$ *act*, bacterial cells were plated on MRS agar containing 5  $\mu$ g/ml erythromycin and colonies  
508 were screened for single crossover (SCO) event by PCR with oligonucleotide mixtures oVPL3216-  
509 oVPL3217-oVPL97 (upstream SCO) and oVPL3216-oVPL3217-oVPL49 (downstream SCO).  
510 Following confirmation of SCO, bacterial cells were cultured for one passage in MRS broth  
511 without antibiotic selection, and cells were plated on MRS agar plates containing 400  $\mu$ g/ml  
512 vancomycin. For DSM17938 $\Delta$ *act*, we used a fast-tract liquid-based approach, which does not  
513 require isolation of single-crossover recombinants and cells are plated directly on MRS agar plates  
514 containing 400  $\mu$ g/ml vancomycin. Vancomycin-resistant colonies represent cells in which a  
515 second homologous recombination event took place (Zhang at al. 2018). To confirm double  
516 crossover (DCO), we performed PCR using oligonucleotides oVPL3216-oVPL3217 (for

517 *mlc3* $\Delta$ *act*) and oVPL3244-oVPL3245 (for DSM17938 $\Delta$ *act*). We used Sanger sequencing to verify  
518 the integrity of the recombinant strains.

519

### 520 **Inactivation of *L. reuteri* 6475 acyltransferase by recombineering**

521 To inactivate the gene putatively encoding acyltransferase (LAR\_1287) in *L. reuteri* 6475,  
522 we applied single-stranded DNA recombineering using previously established procedure (Van  
523 Pijkeren et al., 2012). An 80-mer oligonucleotide identical to the lagging strand with five  
524 consecutive mismatches yielded, when incorporated, two in-frame stop codons (Van Pijkeren and  
525 Britton, 2012). Electrocompetent *L. reuteri* 6475 cells harboring pJP042 (VPL2047) were  
526 transformed with 100  $\mu$ g oVPL3166. To identify recombinants, we plated cells on MRS plates and  
527 recombinant genotypes were identified by mismatch amplification mutation assay (MAMA) PCR  
528 (Cha et al., 1992) using oligonucleotide combination oVPL3163-3164-3165. After colony  
529 purification, the pure genotype recombinants were confirmed by MAMA-PCR and Sanger  
530 sequencing. The resulted mutant strain was named as *L. reuteri* 6475 $\Delta$ *act*. To cure pJP042, cells  
531 were grown in plain MRS for two passages and plated on MRS agar. Then cells were inoculated  
532 in MRS containing 5  $\mu$ g/ml erythromycin to identify cells from which pJP042 was cured.

533

### 534 **Construction of *L. reuteri* 6475 $\Delta$ *act::act*, *L. reuteri* 100-23 $\Delta$ *act::act*, and *mlc3* $\Delta$ *act::act***

535 To complement *act* in *L. reuteri* 6475, *L. reuteri* 100-23, and *L. reuteri* *mlc3*, we cloned  
536 the *act* gene from *L. reuteri* 6475 (oVPL3188- oVPL3189) into the pSIP411 backbone (oVPL399-  
537 oVPL400). As described above, PCR products were quantified, DpnI treated and LCR reaction  
538 was performed with bridging oligonucleotides (oVPL3220-3221) and transformed in *E. coli*  
539 EC1000 cells. Insertion was confirmed by colony PCR (oVPL659- oVPL660) and the integrity of

540 the DNA was confirmed by Sanger sequencing. One microgram of the resulting construct  
541 (pVPL31150, hereafter referred to as pSIP-act) was transformed in *L. reuteri* 6475 $\Delta$ act, *L. reuteri*  
542 100-23 and *L. reuteri* mlc3 $\Delta$ act. Bacterial cells were plated on MRS agar containing 5  $\mu$ g/ml  
543 erythromycin to identify cells containing pSIP-act overexpression plasmid (pVPL31150).

544

#### 545 **Generating rifampicin resistant *L. reuteri* strains**

546 To enumerate the bacteria co-cultured with R2lc::cm, we generated mutants that naturally  
547 acquired mutations to yield resistance to rifampicin. Briefly, *L. reuteri* strains were grown in MRS  
548 for 16 hours and plated on MRS agar containing 25  $\mu$ g/ml rifampicin followed by 24 hours of  
549 incubation at 37°C under hypoxic condition. Rifampicin resistant colonies were picked from  
550 plates and after colony purification stored at -80°C.

#### 551 **Whole Genome Sequencing**

552 Genomic DNA was isolated using the genomic DNA purification kit (Wizard, Promega),  
553 and DNA concentrations were determined using the Qubit® (dsDNA High Sensitivity Assay Kit,  
554 Life Technologies). Whole genome sequencing was performed at the University of Wisconsin-  
555 Madison Biotechnology Center. Samples were prepared according to the Celero PCR Workflow  
556 with Enzymatic Fragmentation (NuGEN). Quality and quantity of the finished libraries were  
557 assessed using an Agilent bioanalyzer and Qubit® dsDNA HS Assay Kit, respectively. Libraries  
558 were standardized to 2 nM. Paired end, 250 bp sequencing was performed using the Illumina  
559 NovaSeq6000. Images were analyzed using the standard Illumina Pipeline, version 1.8.2.

560

#### 561 **Comparative Genome and Bioinformatic Analyses**



562 Reads were assembled *de novo* using SPAdes (version 3.11.1) software. Assembled draft  
563 genomes were uploaded to National Center of Biotechnology Information (NCBI) (Zhang et al.  
564 accepted) and the Joint Genome Institute Integrated Microbial Genomes and Microbes (JGI-IMG)  
565 database to perform comparative genome analyses. The web-based comparative genome database  
566 Phylogenetic Profiler from the JGI-IMG was used to identify genes present only in *L. reuteri*  
567 strains that are resistant to R2lc (ATCC PTA6475 [named as MM4-1A in JGI-IMG], mlc3,  
568 DSM20016 and Lr4000).

569 We used *L. reuteri* JCM112 acyltransferase protein sequence (LAR\_1287) as a query  
570 sequence to search the National Center for Biotechnology Information (NCBI) Nonredundant  
571 protein sequence (nr) and JGI-IMG database to identify homologous among *L. reuteri* strains.  
572 Partial protein sequences were excluded from the data set. Amino acid sequences of *L. reuteri act*  
573 genes were aligned by using MUSCLE (Edgar, 2004), and we constructed the phylogenetic tree  
574 with MEGA 7.0 software (Kumar et al. 2016).

575

#### 576 ***In vitro* competition assay with *L. reuteri* strains**

577 *L. reuteri* strains were grown in MRS for 16 hours. The rifampicin resistant competition  
578 strains were co-cultured with either R2lc::*Cm* or R2lcΔ*pks*::*Cm* at optical density OD<sub>600</sub>: 0.05  
579 (from each strain in co-culture) in a pre-warmed MRS broth (pH 4.0). The co-cultures were then  
580 incubated for 24 hours at 37°C. After incubation, a serial dilution was performed and 100 µl from  
581 appropriate dilution was plated to MRS plates containing chloramphenicol (5 µg/ml) or rifampicin  
582 (25 µg/ml). After 24 hours of incubation, we determined the competition ratios.

583

#### 584 ***In vitro* biofilm assay**

585 *L. reuteri* R2lc, R2lc $\Delta$ *pks* and 100-23 cultures were inoculated into 2 ml MRS broth at  
586 OD<sub>600</sub>= 0.1 (0.05 from each strain if co-culture) in 24-well plates (Fisher Scientific) and incubated  
587 for 24 hours. The culture supernatant was removed and bacterial biofilm was washed three times  
588 with 1 ml PBS. The adherent cells were scraped from the well and re-suspended in 2 ml PBS.  
589 For colony enumeration, the suspended cultures were plated on MRS plates containing  
590 chloramphenicol (5  $\mu$ g/ml) for R2lc and R2lc $\Delta$ *pks* or rifampicin (25  $\mu$ g/ml) for 100-23, and  
591 incubated for 24 hours.

592

### 593 ***In vivo* competition experiment**

594 Germ-free B6 (C57BL/6J, male 12-week old, n=4-5mice/group) mice were maintained in  
595 sterile biocontainment cages in the gnotobiotic animal facility at the University of Wisconsin-  
596 Madison. Mice were colonized following a single oral gavage of 200  $\mu$ l *L. reuteri* cocktail in  
597 PBS (1:1 ratio,  $\sim 2 \times 10^8$  CFU). Each group was gavaged with a mixture of either *L. reuteri*  
598 R2lc::*Cm* + competition strain or *L. reuteri* R2lc $\Delta$ *pks*::*Cm* + competition strain. Twenty-four  
599 hours following colonization, fecal samples were collected daily from individual mice to  
600 determine the fecal CFUs. Fecal samples were homogenized and diluted in PBS followed by  
601 plating on MRS-Cm and MRS-Rif. After 24 hours of incubation colonies were counted. At day  
602 7, mice were sacrificed by CO<sub>2</sub> asphyxiation and digesta from forestomach, jejunum, cecum and  
603 colon were collected, weighed and re-suspended with PBS (100 mg/ml) to determine the CFUs  
604 per 100 mg content.

605

### 606 **Determination of peptidoglycan O'-acylation by HPLC**

607 Peptidoglycan (PG) was extracted following a previously reported method (Ha et al., 2016)  
608 with some modifications. After 16 hours of incubation, the cells were harvested by centrifugation  
609 at  $5,000 \times g$  and  $4^\circ\text{C}$  for 5 min, washed twice with 10 mM sodium phosphate buffer (pH 6.5) and  
610 then resuspended in 50 ml of water (pH 5.5 to 6.0). The cell suspension was boiled in an equal  
611 volume of 8% (w/v) sodium dodecyl sulfate (SDS, 4% w/v final concentration) in 25 mM SP  
612 buffer (pH 6.5) for 1 hour under reflux with stirring. Samples were centrifuged ( $30,000 \times g$ ) and  
613 the SDS-insoluble PG was washed (5 times) with sterile double distilled  $\text{H}_2\text{O}$  to completely  
614 remove SDS and lyophilized. Lyophilized PG was dissolved in 4 ml of 1:1 mixture of 10 mM Tris-  
615 HCl (pH 6.5) and 10 mM NaCl and sonicated for 2 min. The PG suspension was treated with 100  
616  $\mu\text{g}/\text{ml}$   $\alpha$ -amylase (from *Bacillus sp.*, Sigma), 10  $\mu\text{g}/\text{ml}$  DNase I (Invitrogen), 50  $\mu\text{g}/\text{ml}$  RNase A  
617 (Thermo Scientific), and 20 mM  $\text{MgSO}_4$  solution and incubated overnight at  $37^\circ\text{C}$  with shaking.  
618 The PG suspension was further treated with 200  $\mu\text{g}/\text{ml}$  protease (from *Streptomyces griseus*,  
619 Sigma) and incubated overnight at  $37^\circ\text{C}$  with shaking. Samples were then re-extracted by boiling  
620 in 1% SDS for 40 min, washed, lyophilized and stored at  $-20^\circ\text{C}$  until use.

621 For the analysis of acetate release from PG, lyophilized PG (20 mg) was dissolved in 150  
622  $\mu\text{l}$  dd $\text{H}_2\text{O}$  and mixed with an equal volume of either 160 mM NaOH or 160 mM sodium  
623 phosphate buffer (pH 6.5) and incubated overnight at  $37^\circ\text{C}$  with shaking. The peptidoglycan was  
624 collected by centrifugation at  $15,000 \times g$  for 20 min. The supernatant was filtered through a 0.45-  
625  $\mu\text{m}$ -pore-size cellulose acetate membrane and quantitation of released acetate was carried out in  
626 a Dionex UltiMate 3000 HPLC equipped with an LPG-3400 quaternary pump, a WPS-3000  
627 analytical autosampler, and a DAD-3000 diode array detector. The filtered supernatants or 100  
628  $\mu\text{M}$  of acetic acid standard solution were injected onto a  $300 \times 7.8$  mm Rezex<sup>TM</sup> ROA-Organic

629 Acid H<sup>+</sup> (8%) column and eluted isocratically with 20 mM H<sub>2</sub>SO<sub>4</sub> at 0.5 ml min<sup>-1</sup>. The column  
630 was maintained and 40 °C and absorbance was monitored at 210 nm.

631

### 632 **LC/MS Sample preparation**

633 An aliquot of 1.5 ml from each of the cultures were collected in Eppendorf tubes and  
634 centrifuged at 2152 × g for 5 min. The supernatants were collected and transferred to dram vials  
635 and the cell pellets were incubated for 1 hour in 100 µl methanol. Next, the samples were  
636 centrifuged again and the methanol extracts were added to 1 dram vials. A Gilson GX-271 liquid  
637 handling system was used to subject 900 µL of the samples to automated solid phase extraction  
638 (SPE). Extracts were loaded onto pre-conditioned (1 ml MeOH followed by 1 ml H<sub>2</sub>O) EVOLUTE  
639 ABN SPE cartridges (25 mg absorbent mass, 1 ml reservoir volume; Biotage, S4 Charlotte, NC).  
640 Samples were subsequently washed using H<sub>2</sub>O (1 ml) to remove media components, and eluted  
641 with MeOH (500 µL) directly into an LC/MS-certified vial.

642

### 643 **UHPLC/HRESI-qTOF-MS Analysis of Extracts**

644 LC/MS data were acquired using a Bruker MaXis ESI-qTOF mass spectrometer (Bruker,  
645 Billerica, MA) coupled with a Waters Acquity UPLC system (Waters, Milford, MA) with a PDA  
646 detector operated by Bruker Hystar software, as previously described (Hou et al., 2012). Briefly,  
647 a solvent system of MeOH and H<sub>2</sub>O (containing 0.1% formic acid) was used on an RP C-18 column  
648 (Phenomenex Kinetex 2.6µm, 2.1 × 100 mm; Phenomenex, Torrance, CA) at a flow rate of 0.3  
649 ml/min. The chromatogram method started with a linear gradient from MeOH/ H<sub>2</sub>O (10%/90%)  
650 to MeOH/ H<sub>2</sub>O (97%/3%) in 12 min, then held for 2 min at MeOH/ H<sub>2</sub>O (97%/3%). Full scan mass  
651 spectra (m/z-150-1550) were measured in positive Electrospray Ionization (ESI) mode. The mass

652 spectrometer was operated using the following parameters: capillary, 4.5 kV; nebulizer pressure,  
653 1.2 bar; dry gas flow, 8.0 L/min; dry gas temperature, 205 °C; scan rate, 2 Hz. Tune mix (ESI-L  
654 low concentration; Agilent, Santa Clara, CA) was introduced through a divert valve at the end of  
655 each chromatographic run for automated internal calibration. Bruker Data Analysis 4.2 software  
656 was used for analysis of chromatograms.

657

658

659

660 SUPPLEMENTARY FIGURES

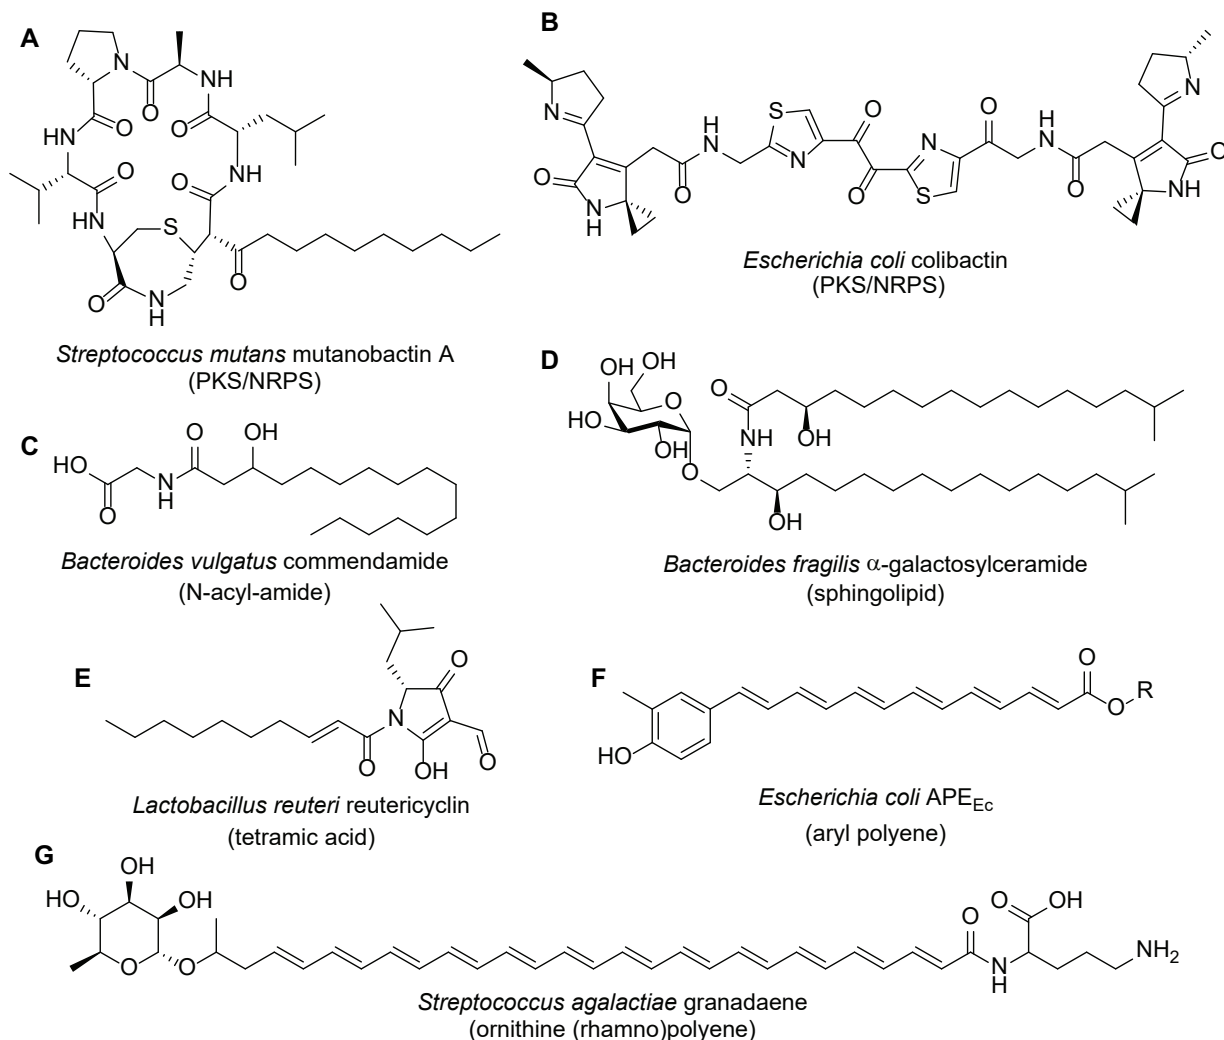

661

662 **Figure s1. Structures of bioactive fatty acid-like, polyketide and NRPS/PKS hybrid**

663 **compounds in bacteria from the gastrointestinal tract.** Up to date, there are only seven

664 microbial metabolites from GI tract have been chemically identified. These are an antifungal

665 PKS/NRPS hybrid metabolite, Mutanobactin A produced by *Streptococcus mutans*, a genotoxin

666 PKS/NRPS hybrid metabolite, Colibactin produced by *Escherichia coli*; a G-Protein Coupled

667 Receptors (GPCR) agonist N-acyl-amide metabolite, Mutanobactin A, produced by *Bacteroides*

668 *vulgatus*; an invariant Natural Killer Cell (iNTK) activator sphingolipid metabolite,  $\alpha$ -

669 galactosylceramide, produced by *Bacteroides fragilis*; an antimicrobial tetramic acid metabolite,  
670 Reutericyclin, produced by *Lactobacillus reuteri*; an antioxidant aryl polyene molecule, APEEC,  
671 produced by *Escherichia coli*; a polyene ornithine compound, Granadaene, produced by  
672 *Streptococcus agalactiae*. Related to Introduction.  
673

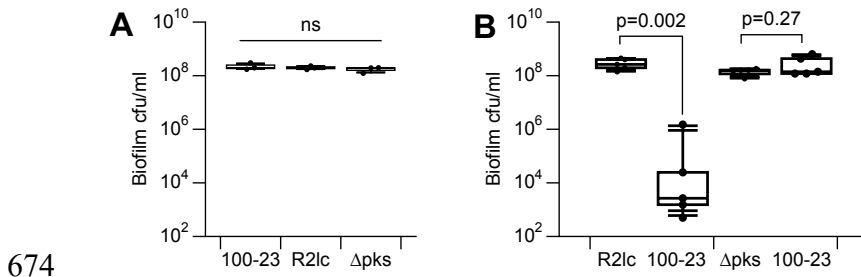

674

675 **Figure s2. A polyketide synthase cluster in *L. reuteri* R2lc inhibits biofilm formation of *L.***

676 ***reuteri* 100-23.** A) Quantification of the number of CFU in single and B) co-culture biofilm. For

677 box and whisker plots, the whiskers represent the maximum and minimal values, and the lower,

678 middle and upper line of the box represent first quartile, median and third quartile, respectively.

679 Circles represent individual data points. All data represent an average of at least three

680 independent experiments. Statistical significance was determined by Wilcoxon / Kruskal-Wallis

681 Tests  $p < 0.05$  considered as significant.  $p = P$  value. Related to Figure 1.

682

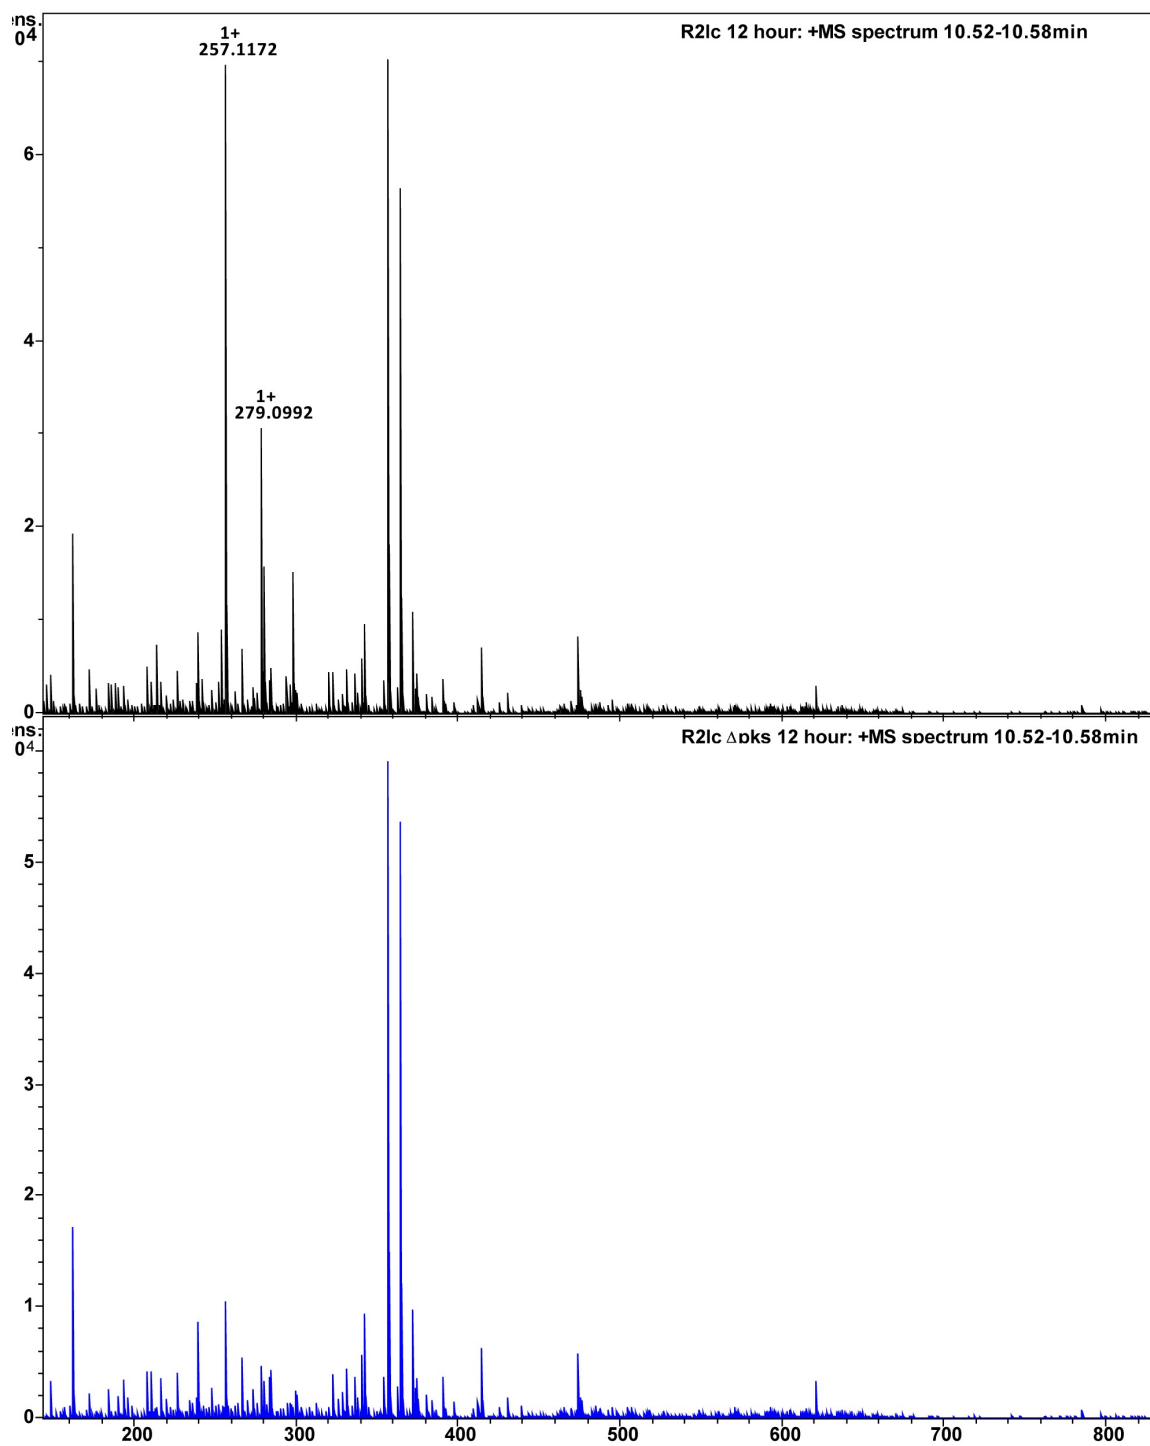

683  
684 **Figure s3. R2lc but not *pks* mutant produces unique compounds.** The mass spectrum of the  
685 peak between 10.52 min –10.58 min in the R2lc chromatogram at 12 hours clearly showed an ion  
686 with m/zvalue of 257.1172 as the [M+H]<sup>+</sup>and 279.0092 as the corresponding [M+Na]<sup>+</sup> which



687 were absent in the corresponding 12-hour culture of  $\Delta$ pks. Bruker Smart Formula algorithm,  
688 which uses both the exact mass of the molecular ion and the isotopic pattern allowed accurate  
689 determination of the molecular formula as  $C_{16}H_{16}O_3$ . Related to Figure 1.

690

691 **Table S1.** Strains used for comparative genome analyses.

| Strain Number | Strain                | Sensitive/Resistant* |
|---------------|-----------------------|----------------------|
| 1             | CR                    | S                    |
| 2             | 100-23                | S                    |
| 3             | L1604-1               | S                    |
| 4             | ATCC53608             | S                    |
| 5             | 3c6                   | S                    |
| 6             | L1600-1               | S                    |
| 7             | one-one               | S                    |
| 8             | rat19                 | S                    |
| 9             | JCM1081               | S                    |
| 10            | I5007                 | S                    |
| 11            | 6799jm-1              | S                    |
| 12            | lpuph                 | S                    |
| 13            | CF48-3A1              | S                    |
| 14            | 1366                  | S                    |
| 15            | N2J                   | S                    |
| 16            | LR4020                | S                    |
| 17            | SD2112                | S                    |
| 18            | AD23                  | S                    |
| 19            | N4I                   | S                    |
| 20            | 100-93                | S                    |
| 21            | PTA6475               | R                    |
| 22            | DSM20016 <sup>T</sup> | R                    |
| 23            | mlc3                  | R                    |
| 24            | Lr4000                | R                    |

692 \*Sensitive/resistant phenotypes were determined based on statistical analyses shown in  
693 Figure 4. S: sensitive, R: Resistant. Related to Figure 4.

694

695

696 **Table S2.** Unique genes in R2lc-resistat 6475, DSM20016<sup>T</sup> and mlc3.

| Locus Tag | Gene Name                           | Length (aa) |
|-----------|-------------------------------------|-------------|
| Lreu_0435 | hypothetical protein                | 69          |
| Lreu_0848 | holin, Cph1 family                  | 149         |
| Lreu_1143 | transcription regulator, XRE family | 67          |
| Lreu_1353 | hypothetical protein                | 522         |
| Lreu_1362 | glycosyltransferase                 | 324         |
| Lreu_1368 | acyltransferase                     | 355         |
| Lreu_1869 | hypothetical protein                | 175         |

697 aa: amino acid. Related to Figure 4.

698

699 **Table S3.** Bacterial strains used in this study.

| Genus and Species                       | Strain                                                   | VPL identifier | Description/ Origin                                                           | Source                           |
|-----------------------------------------|----------------------------------------------------------|----------------|-------------------------------------------------------------------------------|----------------------------------|
| <i>Escherichia coli</i>                 | EC1000                                                   | VPL1009        | Cloning host                                                                  | (Leenhouts et al., 1996)         |
| <i>Lactococcus lactis ssp. cremoris</i> | MG1363                                                   | VPL2005        | <i>L. lactis</i> MG1363 harboring pSIP411                                     | Laboratory stock                 |
| <i>Lactobacillus reuteri</i>            | R2lc                                                     | VPL1053        | Rat                                                                           | Siv Ahrné—JGI 2716884882         |
| <i>Lactobacillus reuteri</i>            | R2lc:: <i>Cm</i>                                         | VPL4231        | Insertion of <i>Cm</i> gene in R2lc chromosome                                | This study                       |
| <i>Lactobacillus reuteri</i>            | R2lc $\Delta$ <i>fun</i> :: <i>Cm</i>                    | VPL4234        | Insertion of <i>Cm</i> gene in R2lc $\Delta$ <i>fun</i> chromosome            | This study                       |
| <i>Lactobacillus reuteri</i>            | R2lc $\Delta$ <i>pks</i> :: <i>Cm</i>                    | VPL4209        | Insertion of <i>Cm</i> gene in R2lc $\Delta$ <i>pks</i> chromosome            | (Özçam et al., 2019)             |
| <i>Lactobacillus reuteri</i>            | 6475 (pJP042)                                            | VPL2047        | 6475 harboring pJP042 plasmid                                                 | (Van Pijkeren and Britton, 2012) |
| <i>Lactobacillus reuteri</i>            | 6475 $\Delta$ <i>act</i>                                 | VPL4241        | Deletion of <i>act</i> gene in 6475                                           | This study                       |
| <i>Lactobacillus reuteri</i>            | 6475 $\Delta$ <i>act</i> —Rif <sup>R</sup> (pSIP411)     | VPL31153       | 6475 $\Delta$ <i>act</i> —Rif <sup>R</sup> harboring pSIP411 plasmid          | This study                       |
| <i>Lactobacillus reuteri</i>            | 6475 $\Delta$ <i>act</i> :: <i>act</i> —Rif <sup>R</sup> | VPL4250        | 6475 $\Delta$ <i>act</i> —Rif <sup>R</sup> harboring pSIP- <i>act</i> plasmid | This study                       |
| <i>Lactobacillus reuteri</i>            | 100-23                                                   | VPL1049        | Rat                                                                           | JGI: 2500069000                  |
| <i>Lactobacillus reuteri</i>            | 100-23—Rif <sup>R</sup>                                  | VPL4251        | 100-23 Rif resistant                                                          | This study                       |
| <i>Lactobacillus reuteri</i>            | 100-23—Rif <sup>R</sup> (pSIP411)                        | VPL31155       | 100-23—Rif <sup>R</sup> harboring pSIP411 plasmid                             | This study                       |
| <i>Lactobacillus reuteri</i>            | 100-23:: <i>act</i> —Rif <sup>R</sup>                    | VPL4249        | Deletion of <i>act</i> gene in 100-23, Rif resistant                          | This study                       |
| <i>Lactobacillus reuteri</i>            | 6475                                                     | VPL1014        | Human                                                                         | BioGaia AB                       |
| <i>Lactobacillus reuteri</i>            | 6475—Rif <sup>R</sup>                                    | VPL4296        | 6475, Rif resistant                                                           | This study                       |
| <i>Lactobacillus reuteri</i>            | SD2112                                                   | VPL1013        | Human                                                                         | BioGaia AB                       |
| <i>Lactobacillus reuteri</i>            | SD2112—Rif <sup>R</sup>                                  | VPL4297        | SD2112, Rif resistant                                                         | This study                       |
| <i>Lactobacillus reuteri</i>            | CSB7                                                     | VPL1168        | Chicken                                                                       | Jens Walter                      |
| <i>Lactobacillus reuteri</i>            | CSB7—Rif <sup>R</sup>                                    | VPL4298        | CSB7, Rif resistant                                                           | This study                       |
| <i>Lactobacillus reuteri</i>            | KYE26                                                    | VPL1162        | Chicken                                                                       | Jens Walter                      |
| <i>Lactobacillus reuteri</i>            | KYE26—Rif <sup>R</sup>                                   | VPL4299        | KYE26, Rif resistant                                                          | This study                       |
| <i>Lactobacillus reuteri</i>            | LK159                                                    | VPL1156        | Chicken                                                                       | Jens Walter                      |
| <i>Lactobacillus reuteri</i>            | LK159—Rif <sup>R</sup>                                   | VPL4301        | LK159, Rif resistant                                                          | This study                       |
| <i>Lactobacillus reuteri</i>            | L4                                                       | VPL1173        | Chicken                                                                       | Jens Walter                      |
| <i>Lactobacillus reuteri</i>            | L4—Rif <sup>R</sup>                                      | VPL4302        | L4, Rif resistant                                                             | This study                       |
| <i>Lactobacillus reuteri</i>            | mouse2                                                   | VPL1070        | Mouse                                                                         | (Frese et al., 2011)             |
| <i>Lactobacillus reuteri</i>            | Mouse2—Rif <sup>R</sup>                                  | VPL4252        | Mouse2, Rif resistant                                                         | This study                       |
| <i>Lactobacillus reuteri</i>            | N2J                                                      | VPL1052        | Rat                                                                           | (Frese et al. 2011)              |
| <i>Lactobacillus reuteri</i>            | N2J—Rif <sup>R</sup>                                     | VPL4253        | N2J, Rif resistant                                                            | This study                       |
| <i>Lactobacillus reuteri</i>            | one-one                                                  | VPL1060        | Mouse                                                                         | (Frese et al. 2011)              |
| <i>Lactobacillus reuteri</i>            | one-one—Rif <sup>R</sup>                                 | VPL4254        | one-one, Rif resistant                                                        | This study                       |
| <i>Lactobacillus reuteri</i>            | ATCC 53608                                               | VPL1090        | Pig                                                                           | BioGaia AB EMBL LN906634         |
| <i>Lactobacillus reuteri</i>            | ATCC 53608—Rif <sup>R</sup>                              | VPL4255        | ATCC 53608, Rif resistant                                                     | This study                       |

|                              |                                                          |          |                                                                               |                            |
|------------------------------|----------------------------------------------------------|----------|-------------------------------------------------------------------------------|----------------------------|
| <i>Lactobacillus reuteri</i> | L1600-1                                                  | VPL1064  | Mouse                                                                         | (Frese <i>et al.</i> 2011) |
| <i>Lactobacillus reuteri</i> | L1600-1—Rif <sup>R</sup>                                 | VPL4256  | L1600-1, Rif resistant                                                        | This study                 |
| <i>Lactobacillus reuteri</i> | N2D                                                      | VPL1067  | Rat                                                                           | Siv Ahrné                  |
| <i>Lactobacillus reuteri</i> | N2D—Rif <sup>R</sup>                                     | VPL4257  | N2D, Rif resistant                                                            | This study                 |
| <i>Lactobacillus reuteri</i> | DSM17938                                                 | VPL4171  | Human                                                                         | BioGaia AB                 |
| <i>Lactobacillus reuteri</i> | DSM17938—Rif <sup>R</sup>                                | VPL4258  | DSM17938, Rif resistant                                                       | This study                 |
| <i>Lactobacillus reuteri</i> | DSM17938 $\Delta$ <i>act</i>                             | VPL4313  | Deletion of <i>act</i> gene in DSM17938                                       | This study                 |
| <i>Lactobacillus reuteri</i> | DSM17938 $\Delta$ <i>act</i> —Rif <sup>R</sup>           | VPL4315  | DSM17938 $\Delta$ <i>act</i> , Rif resistant                                  | This study                 |
| <i>Lactobacillus reuteri</i> | Lr4000                                                   | VPL1071  | Mouse                                                                         | BioGaia AB                 |
| <i>Lactobacillus reuteri</i> | Lr4000—Rif <sup>R</sup>                                  | VPL4259  | Lr4000, Rif resistant                                                         | This study                 |
| <i>Lactobacillus reuteri</i> | CF48-3A1                                                 | VPL1086  | Human                                                                         | BioGaia AB—JGI2502171173   |
| <i>Lactobacillus reuteri</i> | CF48-3A1—Rif <sup>R</sup>                                | VPL4260  | CF48-3A1, Rif resistant                                                       | This study                 |
| <i>Lactobacillus reuteri</i> | L1604-1                                                  | VPL1066  | Mouse                                                                         | (Frese <i>et al.</i> 2011) |
| <i>Lactobacillus reuteri</i> | L1604-1—Rif <sup>R</sup>                                 | VPL4261  | L1604-1, Rif resistant                                                        | This study                 |
| <i>Lactobacillus reuteri</i> | CR                                                       | VPL1059  | Rat                                                                           | (Frese <i>et al.</i> 2011) |
| <i>Lactobacillus reuteri</i> | CR—Rif <sup>R</sup>                                      | VPL4262  | CR, Rif resistant                                                             | This study                 |
| <i>Lactobacillus reuteri</i> | mlc3                                                     | VPL1050  | Mouse                                                                         | JGI: 2506381016            |
| <i>Lactobacillus reuteri</i> | mlc3—Rif <sup>R</sup>                                    | VPL4263  | mlc3, Rif resistant                                                           | JGI: 2506381016            |
| <i>Lactobacillus reuteri</i> | mlc3 $\Delta$ <i>act</i>                                 | VPL4246  | Deletion of <i>act</i> gene in mlc3                                           | This study                 |
| <i>Lactobacillus reuteri</i> | mlc3 $\Delta$ <i>act</i> —Rif <sup>R</sup>               | VPL4308  | mlc3 $\Delta$ <i>act</i> , Rif resistant                                      | This study                 |
| <i>Lactobacillus reuteri</i> | mlc3 $\Delta$ <i>act</i> —Rif <sup>R</sup> (pSIP411)     | VPL31177 | mlc3 $\Delta$ <i>act</i> —Rif <sup>R</sup> , harboring pSIP411 plasmid        | This study                 |
| <i>Lactobacillus reuteri</i> | mlc3 $\Delta$ <i>act</i> :: <i>act</i> —Rif <sup>R</sup> | VPL31165 | mlc3 $\Delta$ <i>act</i> —Rif <sup>R</sup> harboring pSIP- <i>act</i> plasmid | This study                 |
| <i>Lactobacillus reuteri</i> | I5007                                                    | VPL1082  | Pig                                                                           | JGI: 2554235423            |
| <i>Lactobacillus reuteri</i> | I5007—Rif <sup>R</sup>                                   | VPL4264  | I5007, Rif resistant                                                          | This study                 |
| <i>Lactobacillus reuteri</i> | Lr4020                                                   | VPL1072  | Mouse                                                                         | (Frese <i>et al.</i> 2011) |
| <i>Lactobacillus reuteri</i> | Lr4020—Rif <sup>R</sup>                                  | VPL4265  | Lr4020, Rif resistant                                                         | This study                 |
| <i>Lactobacillus reuteri</i> | Lp167-67                                                 | VPL1085  | Pig                                                                           | BioGaia AB JGI 2599185361  |
| <i>Lactobacillus reuteri</i> | Lp167-67—Rif <sup>R</sup>                                | VPL4266  | Lp167-67, Rif resistant                                                       | This study                 |
| <i>Lactobacillus reuteri</i> | N4I                                                      | VPL1063  | Rat                                                                           | (Frese <i>et al.</i> 2011) |
| <i>Lactobacillus reuteri</i> | N4I—Rif <sup>R</sup>                                     | VPL4267  | N4I, Rif resistant                                                            | This study                 |
| <i>Lactobacillus reuteri</i> | 3c6                                                      | VPL1083  | Pig                                                                           | JGI: 2599185333            |
| <i>Lactobacillus reuteri</i> | 3c6—Rif <sup>R</sup>                                     | VPL4268  | 3c6, Rif resistant                                                            | This study                 |
| <i>Lactobacillus reuteri</i> | FUA3043                                                  | VPL1062  | Rat                                                                           | (Frese <i>et al.</i> 2011) |
| <i>Lactobacillus reuteri</i> | FUA3043—Rif <sup>R</sup>                                 | VPL4269  | FUA3043, Rif resistant                                                        | This study                 |
| <i>Lactobacillus reuteri</i> | Rat 19                                                   | VPL1069  | Rat                                                                           | (Frese <i>et al.</i> 2011) |
| <i>Lactobacillus reuteri</i> | Rat 19—Rif <sup>R</sup>                                  | VPL4270  | Rat 19, Rif resistant                                                         | This study                 |
| <i>Lactobacillus reuteri</i> | 6799jm-1                                                 | VPL1051  | Mouse                                                                         | (Frese <i>et al.</i> 2011) |
| <i>Lactobacillus reuteri</i> | 6799jm-1—Rif <sup>R</sup>                                | VPL4271  | 6799jm-1, Rif resistant                                                       | This study                 |
| <i>Lactobacillus reuteri</i> | 100-93                                                   | VPL1047  | Mouse                                                                         | (Frese <i>et al.</i> 2011) |
| <i>Lactobacillus reuteri</i> | 100-93—Rif <sup>R</sup>                                  | VPL4272  | 100-93, Rif resistant                                                         | This study                 |
| <i>Lactobacillus reuteri</i> | Lpuph-1                                                  | VPL1056  | Mouse                                                                         | JGI: 2506381017            |
| <i>Lactobacillus reuteri</i> | Lpuph-1—Rif <sup>R</sup>                                 | VPL4273  | Lpuph-1, Rif resistant                                                        | This study                 |
| <i>Lactobacillus reuteri</i> | DSM 20016                                                | VPL1046  | Human                                                                         | JGI: 640427118             |

|                              |                               |         |                          |                            |
|------------------------------|-------------------------------|---------|--------------------------|----------------------------|
| <i>Lactobacillus reuteri</i> | DSM 20016—Rif <sup>R</sup>    | VPL4274 | DSM 20016, Rif resistant | This study                 |
| <i>Lactobacillus reuteri</i> | AD 23                         | VPL1048 | Rat                      | (Frese <i>et al.</i> 2011) |
| <i>Lactobacillus reuteri</i> | AD 23—Rif <sup>R</sup>        | VPL4275 | AD 23, Rif resistant     | This study                 |
| <i>Lactobacillus reuteri</i> | 173/4                         | VPL1135 | Pig                      | Jens Walter                |
| <i>Lactobacillus reuteri</i> | 173/4—Rif <sup>R</sup>        | VPL4276 | 173/4, Rif resistant     | This study                 |
| <i>Lactobacillus reuteri</i> | 4S17                          | VPL1122 | Pig                      | (Frese <i>et al.</i> 2011) |
| <i>Lactobacillus reuteri</i> | 4S17—Rif <sup>R</sup>         | VPL4277 | 4S17, Rif resistant      | This study                 |
| <i>Lactobacillus reuteri</i> | 1366                          | VPL1115 | Chicken                  | Jens Walter                |
| <i>Lactobacillus reuteri</i> | 1366—Rif <sup>R</sup>         | VPL4278 | 1366, Rif resistant      | This study                 |
| <i>Lactobacillus reuteri</i> | JW2015                        | VPL1126 | Pig                      | Jens Walter                |
| <i>Lactobacillus reuteri</i> | JW2015—Rif <sup>R</sup>       | VPL4279 | JW2015, Rif resistant    | This study                 |
| <i>Lactobacillus reuteri</i> | 32                            | VPL1137 | Pig                      | Jens Walter                |
| <i>Lactobacillus reuteri</i> | 32—Rif <sup>R</sup>           | VPL4280 | 32, Rif resistant        | This study                 |
| <i>Lactobacillus reuteri</i> | 3S3                           | VPL1120 | Pig                      | Jens Walter                |
| <i>Lactobacillus reuteri</i> | 3S3—Rif <sup>R</sup>          | VPL4281 | 3S3, Rif resistant       | This study                 |
| <i>Lactobacillus reuteri</i> | 13S14                         | VPL1118 | Pig                      | Jens Walter                |
| <i>Lactobacillus reuteri</i> | 13S14—Rif <sup>R</sup>        | VPL4282 | 13S14, Rif resistant     | This study                 |
| <i>Lactobacillus reuteri</i> | LK150                         | VPL1112 | Chicken                  | Jens Walter                |
| <i>Lactobacillus reuteri</i> | LK150—Rif <sup>R</sup>        | VPL4283 | LK150, Rif resistant     | This study                 |
| <i>Lactobacillus reuteri</i> | JCM 1081                      | VPL1110 | Chicken                  | Jens Walter                |
| <i>Lactobacillus reuteri</i> | JCM 1081—Rif <sup>R</sup>     | VPL4284 | JCM 1081, Rif resistant  | This study                 |
| <i>Lactobacillus reuteri</i> | HW8                           | VPL1166 | Chicken                  | Jens Walter                |
| <i>Lactobacillus reuteri</i> | HW8—Rif <sup>R</sup>          | VPL4300 | HW8, Rif resistant       | This study                 |
| <i>Lactobacillus reuteri</i> | JW2019                        | VPL1129 | Pig                      | Jens Walter                |
| <i>Lactobacillus reuteri</i> | JW2019—Rif <sup>R</sup>       | VPL4286 | JW2019, Rif resistant    | This study                 |
| <i>Lactobacillus reuteri</i> | 1133 (146/2)                  | VPL1133 | Pig                      | Jens Walter                |
| <i>Lactobacillus reuteri</i> | 1133 (146/2)—Rif <sup>R</sup> | VPL4287 | 1133, Rif resistant      | This study                 |
| <i>Lactobacillus reuteri</i> | CP415                         | VPL1146 | Pig                      | Jens Walter                |
| <i>Lactobacillus reuteri</i> | CP415—Rif <sup>R</sup>        | VPL4288 | CP415, Rif resistant     | This study                 |
| <i>Lactobacillus reuteri</i> | 1063                          | VPL1143 | Pig                      | Jens Walter                |
| <i>Lactobacillus reuteri</i> | 1063—Rif <sup>R</sup>         | VPL4289 | 1063, Rif resistant      | This study                 |
| <i>Lactobacillus reuteri</i> | 1068                          | VPL1142 | Pig                      | Jens Walter                |
| <i>Lactobacillus reuteri</i> | 1068—Rif <sup>R</sup>         | VPL4291 | 1068, Rif resistant      | This study                 |
| <i>Lactobacillus reuteri</i> | 1048                          | VPL1141 | Pig                      | Jens Walter                |
| <i>Lactobacillus reuteri</i> | 1048—Rif <sup>R</sup>         | VPL4292 | 1048, Rif resistant      | This study                 |
| <i>Lactobacillus reuteri</i> | 1013                          | VPL1140 | Pig                      | Jens Walter                |
| <i>Lactobacillus reuteri</i> | 1013—Rif <sup>R</sup>         | VPL4293 | 1013, Rif resistant      | This study                 |
| <i>Lactobacillus reuteri</i> | 1704                          | VPL1139 | Pig                      | Jens Walter                |
| <i>Lactobacillus reuteri</i> | 1704—Rif <sup>R</sup>         | VPL4294 | 1704, Rif resistant      | This study                 |
| <i>Lactobacillus reuteri</i> | FUA3048                       | VPL1063 | Rat                      | (Frese <i>et al.</i> 2011) |
| <i>Lactobacillus reuteri</i> | FUA3048—Rif <sup>R</sup>      | VPL4295 | FUA3048, Rif resistant   | This study                 |

700  
701  
702  
703  
704  
705

VPL: Van Pijkeren Laboratory strain identification number. pVPL: Van Pijkeren Laboratory plasmid identification number. Rif<sup>R</sup>: rifampicin-resistant; *act*: acyltransferase; JGI: Joint Genome Institute; Cm: Chloramphenicol; Rif: Rifampicin.

**Table S4.** Oligonucleotides used in this study.

| Oligonucleotide | Sequence (5'-3')       | Target/Comment                   |
|-----------------|------------------------|----------------------------------|
| oVPL49          | acaatttcacacaggaaacagc | F. Insert screening of pVPL3002. |
| oVPL97          | ccccattaagtgccgagtgc   | R. Insert screening of pVPL3002. |

|          |                                                                                     |                                                                                                                          |
|----------|-------------------------------------------------------------------------------------|--------------------------------------------------------------------------------------------------------------------------|
| oVPL187  | taccgagctcgaattcactgg                                                               | R. amplifies pVPL3002 backbone.                                                                                          |
| oVPL188  | atcctctagagctcgaactgc                                                               | F. amplifies pVPL3002 backbone.                                                                                          |
| oVPL3113 | acgcacgacaggaagaatttg                                                               | F. amplifies u/s flanking region of CmR <sup>+</sup> insertion cassette.                                                 |
| oVPL3114 | agactcgagcctgtggc                                                                   | R. amplifies u/s flanking region of CmR <sup>+</sup> insertion cassette                                                  |
| oVPL3115 | aagtacgaacgataatcagccc                                                              | F. amplifies d/s flanking region of CmR <sup>+</sup> insertion cassette.                                                 |
| oVPL3116 | agccagtattatgacgggtc                                                                | R. amplifies d/s flanking region of CmR <sup>+</sup> insertion cassette                                                  |
| oVPL2856 | agtgtcatggcgcaataacg                                                                | F. amplifies CmR <sup>+</sup> gene.                                                                                      |
| oVPL2857 | ttataaaagccagtcattaggcc                                                             | R. amplifies CmR <sup>+</sup> gene                                                                                       |
| oVPL3166 | tattaatgttattactagcaaacgaattaataaaatcctattaactag<br>gattagatgcaacgatggaccaggataagca | <i>L. reuteri</i> 6475 <i>act</i> gene recombineering oligo.                                                             |
| oVPL3163 | tgaacaaatcaggccaattatctgg                                                           | F. screening <i>act</i> gene                                                                                             |
| oVPL3164 | tgtatgtgtttggcgtcaggc                                                               | R. screening <i>act</i> gene                                                                                             |
| oVPL3165 | cgttgcatcctaactcctagttaatag                                                         | MAMA oligonucleotide for <i>act</i> gene                                                                                 |
| oVPL659  | tgccccgttagtgaagaag                                                                 | F. amplifies pSIP411 backbone.                                                                                           |
| oVPL660  | attctgctcccgccttatg                                                                 | R. amplifies pSIP411 backbone.                                                                                           |
| oVPL3188 | ttaaggaattatcatcctaacaattatttc                                                      | F. amplifies <i>act</i> gene in <i>L. reuteri</i> 6475.                                                                  |
| oVPL3189 | atgcttaatagtaagagactccac                                                            | R. amplifies <i>act</i> gene in <i>L. reuteri</i> 6475.                                                                  |
| oVPL3194 | acgatattgaatctttgcgactcc                                                            | F. amplifies u/s flanking region of <i>act</i> gene in <i>L. reuteri</i> mlc3.                                           |
| oVPL3195 | tagtggagtctctactactaag                                                              | R. amplifies u/s flanking region of <i>act</i> gene in <i>L. reuteri</i> mlc3.                                           |
| oVPL3196 | aggaatattgtctggagtaagc                                                              | F. amplifies d/s flanking region of <i>act</i> gene in <i>L. reuteri</i> mlc3.                                           |
| oVPL3197 | ccattgtgactgtacatagtt                                                               | R. amplifies d/s flanking region of <i>act</i> gene in <i>L. reuteri</i> mlc3.                                           |
| oVPL3198 | aaacgacggccagtgaaatcgagctcggtaacgatattgaatctt<br>tgcgactccattatg                    | LCR bridging oligonucleotide to ligate plasmid backbone + u/s flanking region of mlc3Δ <i>act</i> deletion cassette.     |
| oVPL3199 | aattatgcttaatagtaagagactccactaaggaatattgtctgga<br>gtaagcttaggaat                    | LCR bridging oligonucleotide to ligate u/s + d/s flanking region of mlc3Δ <i>act</i> deletion cassette.                  |
| oVPL3200 | gtagataaactatgtacagtcacaatggatcctctagagtcga<br>cctgcaggcatgcaa                      | LCR bridging oligonucleotide to ligate d/s + plasmid backbone of mlc3Δ <i>act</i> deletion cassette.                     |
| oVPL3216 | atcaccaccgaagagatacc                                                                | F. <i>L. reuteri</i> mlc3Δ <i>act</i> deletion cassette screening oligonucleotide.                                       |
| oVPL3217 | agttgggtggataagtatgac                                                               | R. <i>L. reuteri</i> mlc3Δ <i>act</i> deletion cassette screening oligonucleotide.                                       |
| oVPL3220 | ataaaatactattacaaggagatttagccatgcttaatagtaaga<br>gactccactacata                     | Bridging oligonucleotide to ligate plasmid backbone + <i>act</i> gene for <i>act</i> gene overexpression cassettes.      |
| oVPL3221 | aataaattgttaggatgataaattccttaagaattcggatccccgg<br>gttcgaaggcgcca                    | Bridging oligonucleotide to ligate plasmid backbone + <i>act</i> gene for <i>act</i> gene overexpression cassettes.      |
| oVPL3237 | acgtgtctcctatgtaataaccg                                                             | F. amplifies u/s flanking region of <i>act</i> gene in <i>L. reuteri</i> DSM17938.                                       |
| oVPL3238 | tataccaaattgtctggat                                                                 | R. amplifies u/s flanking region of <i>act</i> gene in <i>L. reuteri</i> DSM17938.                                       |
| oVPL3239 | aattattcgataatagtgatcc                                                              | F. amplifies d/s flanking region of <i>act</i> gene in <i>L. reuteri</i> DSM17938.                                       |
| oVPL3240 | ccaactcactgacccggta                                                                 | R. amplifies d/s flanking region of <i>act</i> gene in <i>L. reuteri</i> DSM17938.                                       |
| oVPL3241 | aaacgacggccagtgaaatcgagctcggtaacgtgtctcctatg<br>ttaataccgggaaaa                     | LCR bridging oligonucleotide to ligate plasmid backbone + u/s flanking region of DSM17938Δ <i>act</i> deletion cassette. |
| oVPL3242 | actgtaactaatccagcacaatttggtataaattattcgataatag<br>ttgatcctctgt                      | LCR bridging oligonucleotide to ligate u/s + d/s flanking region of DSM17938Δ <i>act</i> deletion cassette.              |
| oVPL3243 | gtttctttttaccgggtcaagtgtggtgatcctctagagtcgacc<br>tgcaggcatgcaa                      | LCR bridging oligonucleotide to ligate d/s + plasmid backbone of DSM17938Δ <i>act</i> deletion cassette.                 |
| oVPL3244 | gaaattgtctgctgatgga                                                                 | F. <i>L. reuteri</i> DSM17938Δ <i>act</i> deletion cassette screening oligonucleotide.                                   |

|          |                   |                                                                                         |
|----------|-------------------|-----------------------------------------------------------------------------------------|
| oVPL3245 | tcccagattctgccaac | R. <i>L. reuteri</i> DSM17938 $\Delta$ act deletion cassette screening oligonucleotide. |
|----------|-------------------|-----------------------------------------------------------------------------------------|

706 oVPL: van Pijkeren Laboratory oligonucleotide identification number. F: Forward, R: Reverse,  
 707 u/s: upstream, d/s: downstream; LCR: Ligase Cycling Reaction.

708  
 709

710 **Table S5.** Plasmids used in this study.

| Plasmid   | Characteristic                                                                                                                                                   | Source               |
|-----------|------------------------------------------------------------------------------------------------------------------------------------------------------------------|----------------------|
| pVPL3002  | pORI19 harboring <i>L. reuteri</i> derived ddlF258Y                                                                                                              | (Zhang et al., 2018) |
| pVPL31150 | pSIP411 harboring <i>L. reuteri</i> 6475 act gene                                                                                                                | This Study           |
| pVPL2042  | Em <sup>R</sup> , pNZ8048 derivative. Cm marker was replaced by Em marker                                                                                        | (Zhang et al., 2018) |
| pVPL31130 | Em <sup>R</sup> , derivative of vector pVPL3002 in which the <i>L. reuteri</i> R2lc::Cm and R2lc $\Delta$ pks::Cm insertion cassette was cloned in the MCS site. | This Study           |
| pVPL31079 | Em <sup>R</sup> , derivative of vector pVPL3002 in which the <i>L. reuteri</i> mlc3 $\Delta$ act deletion cassette was cloned in the MCS site.                   | This Study           |
| pVPL31139 | Em <sup>R</sup> , derivative of vector pVPL3002 in which the <i>L. reuteri</i> DSM17938 $\Delta$ act deletion cassette was cloned in the MCS site.               | This Study           |

711 pVPL: Van Pijkeren Laboratory plasmid identification number. Em<sup>R</sup>: Erythromycin-resistant; Cm<sup>R</sup>:  
 712 Chloramphenicol-resistant. Related to STAR Methods.

713 **Table S6.** Acyltransferase gene in *L. reuteri* strains

| Host   | Host                          | Strain    | Lineage | ACT_genes                  |
|--------|-------------------------------|-----------|---------|----------------------------|
| Rodent | Mouse ( <i>Mus musculus</i> ) | 480_44    | I       | No hits found              |
| Rodent | Mouse ( <i>Mus musculus</i> ) | 482_46    | I       | No hits found              |
| Rodent | Mouse ( <i>Mus musculus</i> ) | 484_39    | I       | No hits found              |
| Rodent | Mouse                         | I49       | I       | No hits found              |
| Rodent | Rat                           | L106      | I       | Identities = 102/377 (27%) |
| Rodent | Rat                           | L107      | I       | Identities = 102/377 (27%) |
| Rodent | <i>Rattus norvegicus</i>      | L109      | I       | Identities = 191/354 (54%) |
| Rodent | <i>Rattus norvegicus</i>      | L110      | I       | Identities = 191/354 (54%) |
| Rodent | <i>Rattus norvegicus</i>      | L111      | I       | Identities = 191/354 (54%) |
| Avian  | Cape teal                     | L5        | I       | No hits found              |
| Avian  | Cape teal                     | L6        | I       | No hits found              |
| Rodent | Mouse                         | lpuph1    | I       | Identities = 63/246 (26%)  |
| Rodent | Mouse ( <i>Mus musculus</i> ) | LR0       | I       | No hits found              |
| Avian  | Bird ( <i>Gallus gallus</i> ) | P43       | I       | No hits found              |
| Rodent | Rat                           | TD1       | I       | Identities = 102/377 (27%) |
| Human  | Human                         | DSM 20016 | II      | Identities = 352/355 (99%) |
| Human  | Human ( <i>Homo sapiens</i> ) | IRT       | II      | Identities = 352/355 (99%) |
| Human  | Human                         | JCM1112   | II      | Identities = 352/355 (99%) |
| Human  | Amaru indians                 | L26       | II      | Identities = 193/354 (55%) |
| Human  | Amaru indians                 | L27       | II      | Identities = 193/354 (55%) |
| Human  | Human                         | L28       | II      | Identities = 352/355 (99%) |
| Human  | Human                         | L29       | II      | Identities = 352/355 (99%) |
| Human  | Human                         | L30       | II      | Identities = 351/355 (99%) |
| Human  | Human                         | L31       | II      | Identities = 351/355 (99%) |

|         |                         |            |     |                             |
|---------|-------------------------|------------|-----|-----------------------------|
| Human   | Human                   | L32        | II  | Identities = 352/355 (99%)  |
| Human   | Human                   | L33        | II  | Identities = 352/355 (99%)  |
| Human   | Human                   | L37        | II  | Identities = 352/355 (99%)  |
| Human   | Human (Homo sapiens)    | MM2-3      | II  | Identities = 352/355 (99%)  |
| Human   | Human (Homo sapiens)    | MM4-1a     | II  | Identities = 352/355 (99%)  |
| Rodent  | Rat                     | 100-23     | III | No hits found               |
| Rodent  | Mouse                   | 103b       | III | Identities = 355/355 (100%) |
| Rodent  | Mouse                   | 107k       | III | No hits found               |
| Rodent  | Mouse                   | 111b       | III | Identities = 355/355 (100%) |
| Rodent  | Mouse                   | 609d       | III | No hits found               |
| Human   | Human (Homo sapiens)    | DS12_10    | III | No hits found               |
| Rodent  | Mouse                   | L118       | III | No hits found               |
| Rodent  | Mouse                   | L119       | III | No hits found               |
| Rodent  | Mouse                   | L120       | III | Identities = 106/379 (28%)  |
| Human   | Amaru indians           | L25        | III | No hits found               |
| Rodent  | Marmota vancouveriensis | L92        | III | Identities = 355/355 (100%) |
| Rodent  | Sourdough               | LTH2584    | III | No hits found               |
| Rodent  | Sourdough               | LTH5448    | III | Identities = 193/354 (55%)  |
| Rodent  | Mouse                   | mlc3       | III | Identities = 355/355 (100%) |
| pig     | Pig                     | ATCC 53608 | IV  | Identities = 192/354 (54%)  |
| pig     | Pig                     | I5007      | IV  | Identities = 107/384 (28%)  |
| pig     | Pig                     | KLR1001    | IV  | Identities = 77/250 (31%)   |
| pig     | Pig                     | KLR2001    | IV  | Identities = 192/354 (54%)  |
| pig     | Pig                     | KLR3002    | IV  | No hits found               |
| Primate | Agile gibbon            | L123       | IV  | Identities = 85/321 (26%)   |
| Primate | Lion-tailed Macaque     | L125       | IV  | Identities = 58/152 (38%)   |
| Primate | Orangutan               | L126       | IV  | No hits found               |
| Primate | Japanese macaque        | L45        | IV  | No hits found               |
| Primate | Japanese macaque        | L46        | IV  | No hits found               |
| Primate | Japanese macaque        | L47        | IV  | No hits found               |
| Primate | Agile gibbon            | L48        | IV  | No hits found               |
| Primate | Agile gibbon            | L49        | IV  | No hits found               |
| Primate | Agile gibbon            | L50        | IV  | No hits found               |
| Primate | Gorilla                 | L55        | IV  | No hits found               |
| Primate | Sulawesi macaque        | L59        | IV  | No hits found               |
| Primate | Mandrill                | L60        | IV  | No hits found               |
| Primate | Mandrill                | L61        | IV  | No hits found               |
| Primate | Mandrill                | L62        | IV  | No hits found               |
| Primate | Monkey                  | L68        | IV  | No hits found               |
| Primate | Monkey                  | L69        | IV  | No hits found               |
| Primate | Orangutan               | L71        | IV  | No hits found               |
| Primate | Orangutan               | L72        | IV  | No hits found               |
| Primate | Orangutan               | L73        | IV  | No hits found               |
| pig     | Pig                     | lp167-67   | IV  | No hits found               |
| pig     | Pig                     | pg-3b      | IV  | No hits found               |
| pig     | Pig                     | ZLR003     | IV  | No hits found               |
| pig     | Pig                     | 20-2       | V   | Identities = 97/388 (25%)   |
| pig     | Pig                     | 3c6        | V   | No hits found               |



|         |                      |           |     |                            |
|---------|----------------------|-----------|-----|----------------------------|
| Avian   | Bird (Gallus gallus) | 1366      | VI  | No hits found              |
| Avian   | Gallus gallus        | An166     | VI  | Identities = 97/388 (25%)  |
| Avian   | Gallus gallus        | An71      | VI  | Identities = 97/388 (25%)  |
| Human   | Human (Homo sapiens) | CF48-3A   | VI  | Identities = 111/391 (28%) |
| Avian   | Bird (Gallus gallus) | CSF8      | VI  | No hits found              |
| Human   | Homo sapiens         | DS17_10   | VI  | No hits found              |
| Avian   | Gallus gallus        | JCM1081   | VI  | No hits found              |
| Avian   | African spoonbill    | L1        | VI  | Identities = 111/391 (28%) |
| Avian   | Golden pheasant      | L10       | VI  | Identities = 82/272 (30%)  |
| Avian   | Golden pheasant      | L11       | VI  | Identities = 82/272 (30%)  |
| Avian   | Golden pheasant      | L12       | VI  | Identities = 82/272 (30%)  |
| Avian   | Poultry              | L17       | VI  | Identities = 97/388 (25%)  |
| Avian   | Quail                | L19       | VI  | Identities = 111/391 (28%) |
| Avian   | Argus pheasant       | L2        | VI  | Identities = 197/354 (56%) |
| Avian   | Quail                | L20       | VI  | Identities = 111/391 (28%) |
| Avian   | Quail                | L21       | VI  | Identities = 111/391 (28%) |
| Avian   | Turkey               | L22       | VI  | No hits found              |
| Avian   | Turkey               | L23       | VI  | Identities = 352/355 (99%) |
| Avian   | Turkey               | L24       | VI  | Identities = 111/391 (28%) |
| Avian   | Argus pheasant       | L3        | VI  | Identities = 352/355 (99%) |
| Human   | Human                | L34       | VI  | Identities = 111/391 (28%) |
| Human   | Human                | L35       | VI  | Identities = 111/391 (28%) |
| Human   | Human                | L36       | VI  | Identities = 111/391 (28%) |
| Avian   | Argus pheasant       | L4        | VI  | Identities = 352/355 (99%) |
| Human   | Png                  | L43       | VI  | Identities = 153/353 (43%) |
| Avian   | Francolin            | L7        | VI  | Identities = 111/391 (28%) |
| Avian   | Francolin            | L8        | VI  | Identities = 111/391 (28%) |
| Avian   | Francolin            | L9        | VI  | Identities = 111/391 (28%) |
| Human   | Human (Homo sapiens) | M27U15    | VI  | Identities = 111/391 (28%) |
| Human   | Human (Homo sapiens) | MD-IIE-43 | VI  | No hits found              |
| Human   | Human (Homo sapiens) | MM34-4A   | VI  | Identities = 111/391 (28%) |
| Human   | Human (Homo sapiens) | RC-14     | VI  | No hits found              |
| Human   | Human (Homo sapiens) | SD2112    | VI  | Identities = 111/391 (28%) |
| Rodent  | Rat                  | L108      | VII | No hits found              |
| Rodent  | Springhaas           | L112      | VII | Identities = 193/354 (55%) |
| Rodent  | Springhaas           | L113      | VII | Identities = 193/354 (55%) |
| Rodent  | Springhaas           | L114      | VII | Identities = 193/354 (55%) |
| Rodent  | Porcupine            | L121      | VII | Identities = 252/355 (71%) |
| Human   | Png                  | L38       | VII | No hits found              |
| Human   | Png                  | L39       | VII | No hits found              |
| Human   | Png                  | L40       | VII | No hits found              |
| Human   | Png                  | L41       | VII | No hits found              |
| Human   | Png                  | L42       | VII | No hits found              |
| Human   | Png                  | L44       | VII | No hits found              |
| Primate | Black howler monkey  | L51       | VII | Identities = 193/354 (55%) |
| Primate | Lion-tailed Macaque  | L56       | VII | Identities = 109/384 (28%) |
| Primate | Lion-tailed Macaque  | L57       | VII | No hits found              |
| Primate | Lion-tailed Macaque  | L58       | VII | No hits found              |



|         |                     |      |                            |                            |
|---------|---------------------|------|----------------------------|----------------------------|
| Primate | Patas monkey        | L65  | VII                        | No hits found              |
| Primate | Monkey              | L70  | VII                        | Identities = 254/355 (72%) |
| Rodent  | Capy C              | L85  | VII                        | No hits found              |
| Rodent  | Capy C              | L86  | VII                        | No hits found              |
| Rodent  | Coendou prehensilis | L87  | VII                        | No hits found              |
| Rodent  | Dasyprocta leporina | L88  | VII                        | No hits found              |
| Rodent  | Dasyprocta leporina | L89  | VII                        | No hits found              |
| Primate | Black howler monkey | L124 | IX                         | Identities = 83/329 (25%)  |
| Primate | Black howler monkey | L52  | IX                         | Identities = 83/329 (25%)  |
| Primate | Black howler monkey | L53  | IX                         | Identities = 83/329 (25%)  |
| Primate | Patas monkey        | L66  | IX                         | No hits found              |
| Primate | Patas monkey        | L67  | IX                         | No hits found              |
| Primate | Mandrill            | L63  | Close to IX                | No hits found              |
| Primate | Mandrill            | L64  | Close to IX                | No hits found              |
| Rodent  | Apodemus agrarius   | L77  | Close to <i>L. reuteri</i> | Identities = 106/384 (28%) |
| Rodent  | Apodemus agrarius   | L78  | Close to <i>L. reuteri</i> | Identities = 106/384 (28%) |
| Rodent  | Apodemus agrarius   | L79  | Close to <i>L. reuteri</i> | Identities = 106/384 (28%) |
| Rodent  | Apodemus agrarius   | L80  | Close to <i>L. reuteri</i> | Identities = 106/384 (28%) |

714 Related to Figure 5.

715

## 716 **References**

- 717 Aleti, G., Baker, J.L., Tang, X., Alvarez, R., Dinis, M., Tran, N.C., Melnik, A. V., Zhong, C.,  
718 Ernst, M., Dorrestein, P.C., et al. (2019). Identification of the Bacterial Biosynthetic Gene  
719 Clusters of the Oral Microbiome Illuminates the Unexplored Social Language of Bacteria during  
720 Health and Disease. *MBio* 10.
- 721 Bonder, M.J., Kurilshikov, A., Tigchelaar, E.F., Mujagic, Z., Imhann, F., Vila, A.V., Deelen, P.,  
722 Vatanen, T., Schirmer, M., Smeekens, S.P., et al. (2016). The effect of host genetics on the gut  
723 microbiome. *Nat. Genet.* 48, 1407–1412.
- 724 Boon, E., Meehan, C.J., Whidden, C., Wong, D.H.-J., Langille, M.G.I., and Beiko, R.G. (2014).  
725 Interactions in the microbiome: communities of organisms and communities of genes. *FEMS*  
726 *Microbiol. Rev.* 38, 90–118.
- 727 Cha, R.S., Zarbl, H., Keohavong, P., and Thilly, W.G. (1992). Mismatch amplification mutation  
728 assay (MAMA): Application to the c-H-ras gene. *Genome Res.* 2, 14–20.

729 Cimermancic, P., Medema, M.H., Claesen, J., Kurita, K., Wieland Brown, L.C., Mavrommatis,  
730 K., Pati, A., Godfrey, P.A., Koehrsen, M., Clardy, J., et al. (2014). Insights into secondary  
731 metabolism from a global analysis of prokaryotic biosynthetic gene clusters. *Cell* 158, 412–421.  
732 David, L.A., Maurice, C.F., Carmody, R.N., Gootenberg, D.B., Button, J.E., Wolfe, B.E., Ling,  
733 A. V, Devlin, A.S., Varma, Y., Fischbach, M.A., et al. (2014). Diet rapidly and reproducibly  
734 alters the human gut microbiome. *Nature* 505, 559–563.  
735 Donia, M.S., Cimermancic, P., Schulze, C.J., Wieland Brown, L.C., Martin, J., Mitreva, M.,  
736 Clardy, J., Linington, R.G., and Fischbach, M.A. (2014). A Systematic Analysis of Biosynthetic  
737 Gene Clusters in the Human Microbiome Reveals a Common Family of Antibiotics. *Cell* 158,  
738 1402–1414.  
739 Duar, R.M., Frese, S.A., Lin, X.B., Fernando, S.C., Burkey, T.E., Tasseva, G., Peterson, D.A.,  
740 Blom, J., Wenzel, C.Q., Szymanski, C.M., et al. (2017). Experimental Evaluation of Host  
741 Adaptation of *Lactobacillus reuteri* to Different Vertebrate Species. *Appl. Environ. Microbiol.*  
742 83, e00132-17.  
743 Edgar, R.C. (2004). MUSCLE: Multiple sequence alignment with high accuracy and high  
744 throughput. *Nucleic Acids Res.* 32, 1792–1797.  
745 Edwards, K.F., Kremer, C.T., Miller, E.T., Osmond, M.M., Litchman, E., and Klausmeier, C.A.  
746 (2018). Evolutionarily stable communities: a framework for understanding the role of trait  
747 evolution in the maintenance of diversity. *Ecol. Lett.* 21, 1853–1868.  
748 Frese, S.A., Benson, A.K., Tannock, G.W., Loach, D.M., Kim, J., Zhang, M., Oh, P.L., Heng,  
749 N.C.K., Patil, P.B., Juge, N., et al. (2011). The evolution of host specialization in the vertebrate  
750 gut symbiont *Lactobacillus reuteri*. *PLoS Genet.* 7.  
751 Frese, S.A., MacKenzie, D.A., Peterson, D.A., Schmaltz, R., Fangman, T., Zhou, Y., Zhang, C.,

- 752 Benson, A.K., Cody, L.A., Mulholland, F., et al. (2013). Molecular Characterization of Host-  
753 Specific Biofilm Formation in a Vertebrate Gut Symbiont. *PLoS Genet.* *9*.
- 754 Le Gac, M., Plucain, J., Hindré, T., Lenski, R.E., and Schneider, D. (2012). Ecological and  
755 evolutionary dynamics of coexisting lineages during a long-term experiment with *Escherichia*  
756 *coli*. *Proc. Natl. Acad. Sci. U. S. A.* *109*, 9487–9492.
- 757 Gruber, G., and Steglich, W. (2007). Calostomal, a polyene pigment from the gasteromycete  
758 *Colostoma cinnabarinum* (Boletales). *Zeitschrift Fur Naturforsch. - Sect. B J. Chem. Sci.* *62*,  
759 129–131.
- 760 Ha, R., Frirdich, E., Sychantha, D., Biboy, J., Taveirne, M.E., Johnson, J.G., DiRita, V.J.,  
761 Vollmer, W., Clarke, A.J., and Gaynor, E.C. (2016). Accumulation of Peptidoglycan *O* -  
762 Acetylation Leads to Altered Cell Wall Biochemistry and Negatively Impacts Pathogenesis  
763 Factors of *Campylobacter jejuni*. *J. Biol. Chem.* *291*, 22686–22702.
- 764 Herbrik, A., Corretto, E., Chroňáková, A., Langhansová, H., Petrásková, P., Hrdý, J., Čihák, M.,  
765 Křišťůfek, V., Bobek, J., Petříček, M., et al. (2020). A Human Lung-Associated *Streptomyces* sp.  
766 TR1341 Produces Various Secondary Metabolites Responsible for Virulence, Cytotoxicity and  
767 Modulation of Immune Response. *Front. Microbiol.* *10*, 3028.
- 768 Hibbing, M.E., Fuqua, C., Parsek, M.R., and Peterson, S.B. (2010). Bacterial competition:  
769 surviving and thriving in the microbial jungle. *Nat. Rev. Microbiol.* *8*, 15–25.
- 770 Hiergeist, A., Gläsner, J., Reischl, U., and Gessner, A. (2015). Analyses of Intestinal Microbiota:  
771 Culture versus Sequencing. *ILAR J.* *56*, 228–240.
- 772 Hooper, L. V., Littman, D.R., Macpherson, A.J., and Program, M.P. (2015). Interactions between  
773 the microbiota and the immune system. *Science (80- )*. *336*, 1268–1273.
- 774 Hou, Y., Braun, D.R., Michel, C.R., Klassen, J.L., Adnani, N., Wyche, T.P., and Bugni, T.S.

775 (2012). Microbial Strain Prioritization Using Metabolomics Tools for the Discovery of Natural  
776 Products. *Anal. Chem.* *84*, 4277–4283.

777 Jacobson, A., Lam, L., Rajendram, M., Tamburini, F., Honeycutt, J., Pham, T., Van Treuren, W.,  
778 Pruss, K., Stabler, S.R., Lugo, K., et al. (2018). A Gut Commensal-Produced Metabolite  
779 Mediates Colonization Resistance to Salmonella Infection. *Cell Host Microbe* *24*, 296–307.e7.

780 Kok, S. De, Stanton, L.H., Slaby, T., Durot, M., Holmes, V.F., Patel, K.G., Platt, D., Shapland,  
781 E.B., Serber, Z., Dean, J., et al. (2014). Rapid and reliable DNA assembly via ligase cycling  
782 reaction. *ACS Synth. Biol.* *3*, 97–106.

783 Kumar, S., Stecher, G., Li, M., Knyaz, C., and Tamura, K. (2018). MEGA X: Molecular  
784 Evolutionary Genetics Analysis across Computing Platforms. *Mol. Biol. Evol.* *35*, 1547–1549.

785 Lee, A.J., Cadelis, M.M., Kim, S.H., Swift, S., Copp, B.R., and Villas-Boas, S.G. (2020).  
786 Epipyron A, a Broad-Spectrum Antifungal Compound Produced by *Epicoccum nigrum* ICMP  
787 19927. *Molecules* *25*, 5997.

788 Leenhouts, K., Buist, G., Bolhuis, A., Berge, A. ten, Kiel, J., Mierau, I., Dabrowska, M.,  
789 Venema, G., and Kok, J. (1996). A general system for generating unlabelled gene replacements  
790 in bacterial chromosomes. *Mol. Gen. Genet.* *MGG 253*, 217–224.

791 Li, J., Sang, M., Jiang, Y., Wei, J., Shen, Y., Huang, Q., Li, Y., and Ni, J. (2021). Polyene-  
792 Producing *Streptomyces* spp. From the Fungus-Growing Termite *Macrotermes barneyi* Exhibit  
793 High Inhibitory Activity Against the Antagonistic Fungus *Xylaria*. *Front. Microbiol.* *12*, 649962.

794 Lin, X.B., Lohans, C.T., Duar, R., Zheng, J., Vederas, J.C., Walter, J., and Gänzle, M. (2015).  
795 Genetic determinants of reutericyclin biosynthesis in *Lactobacillus reuteri*. *Appl. Environ.*  
796 *Microbiol.* *81*, 2032–2041.

797 Lin, X.B., Wang, T., Stothard, P., Corander, J., Wang, J., Baines, J.F., Knowles, S.C.L.,

798 Baltrūnaitė, L., Tasseva, G., Schmaltz, R., et al. (2018). The evolution of ecological facilitation  
799 within mixed-species biofilms in the mouse gastrointestinal tract. *ISME J.* 1.

800 Martínez, I., Maldonado-Gomez, M.X., Gomes-Neto, J.C., Kittana, H., Ding, H., Schmaltz, R.,  
801 Joglekar, P., Cardona, R.J., Marsteller, N.L., Kembel, S.W., et al. (2018). Experimental  
802 evaluation of the importance of colonization history in early-life gut microbiota assembly. *Elife*  
803 7.

804 Medema, M.H., Blin, K., Cimermanic, P., de Jager, V., Zakrzewski, P., Fischbach, M.A.,  
805 Weber, T., Takano, E., and Breitling, R. (2011). antiSMASH: rapid identification, annotation and  
806 analysis of secondary metabolite biosynthesis gene clusters in bacterial and fungal genome  
807 sequences. *Nucleic Acids Res.* 39, W339-46.

808 Medema, M.H., Cimermanic, P., Sali, A., Takano, E., and Fischbach, M.A. (2014). A  
809 Systematic Computational Analysis of Biosynthetic Gene Cluster Evolution: Lessons for  
810 Engineering Biosynthesis. *PLoS Comput. Biol.* 10.

811 Moynihan, P.J., and Clarke, A.J. (2010). O-acetylation of peptidoglycan in gram-negative  
812 bacteria: identification and characterization of peptidoglycan O-acetyltransferase in *Neisseria*  
813 *gonorrhoeae*. *J. Biol. Chem.* 285, 13264–13273.

814 Murray, I.A., and Shaw, W. V. (1997). O-Acetyltransferases for chloramphenicol and other  
815 natural products. *Antimicrob. Agents Chemother.* 41, 1–6.

816 Oh, J.H., and Van Pijkeren, J.P. (2014). CRISPR-Cas9-assisted recombineering in *Lactobacillus*  
817 *reuteri*. *Nucleic Acids Res.* 42.

818 Oh, J.-H., Lin, X.B., Zhang, S., Tollenaar, S.L., Özçam, M., Dunphy, C., Walter, J.E., and  
819 Pijkeren, J.-P. van (2019). Prophages in *Lactobacillus reuteri* are associated with fitness trade-  
820 offs but can increase competitiveness in the gut ecosystem. *Appl. Environ. Microbiol.*

821 Oh, P.L., Benson, A.K., Peterson, D.A., Patil, P.B., Moriyama, E.N., Roos, S., and Walter, J.  
822 (2009). Diversification of the gut symbiont *Lactobacillus reuteri* as a result of host-driven  
823 evolution. *ISME J.* *4*, 377–387.

824 Özçam, M., and van Pijkeren, J.-P. (2019). Draft Genome Sequence of Aryl Hydrocarbon  
825 Receptor Activator Strains *Lactobacillus reuteri* R2lc and 2010. *Microbiol. Resour. Announc.* *8*.

826 Özçam, M., Tocmo, R., Oh, J.H., Afrazi, A., Mezrich, J.D., Roos, S., Claesen, J., and van  
827 Pijkeren, J.P. (2019). Gut symbionts *Lactobacillus reuteri* R2lc and 2010 encode a polyketide  
828 synthase cluster that activates the mammalian aryl hydrocarbon receptor. *Appl. Environ.*  
829 *Microbiol.* *85*.

830 Van Pijkeren, J.P., and Britton, R.A. (2012). High efficiency recombineering in lactic acid  
831 bacteria. *Nucleic Acids Res.* *40*, 1–13.

832 Van Pijkeren, J.-P., Neoh, K.M., Sirias, D., Findley, A.S., and Britton, R.A. (2012). Exploring  
833 optimization parameters to increase ssDNA recombineering in *Lactococcus lactis* and  
834 *Lactobacillus reuteri*. *Bioengineered* *3*, 209–217.

835 Ragland, S.A., and Criss, A.K. (2017). From bacterial killing to immune modulation: Recent  
836 insights into the functions of lysozyme. *PLoS Pathog.* *13*, e1006512.

837 Sambrook, J., and Russell, D.W. (2006). Transformation of *E. coli* by Electroporation. *Cold*  
838 *Spring Harb. Protoc.* *2006*, pdb.prot3933.

839 Sassone-Corsi, M., Nuccio, S.-P., Liu, H., Hernandez, D., Vu, C.T., Takahashi, A.A., Edwards,  
840 R.A., and Raffatellu, M. (2016). Microcins mediate competition among Enterobacteriaceae in the  
841 inflamed gut. *Nature* *540*, 280–283.

842 Savage, D.C., Dubos, R., and Schaedler, R.W. (1968). The gastrointestinal epithelium and its  
843 autochthonous bacterial flora. *J. Exp. Med.* *127*, 67–76.

844 Sender, R., Fuchs, S., and Milo, R. (2016). Revised Estimates for the Number of Human and  
845 Bacteria Cells in the Body. *PLoS Biol.* *14*, e1002533.

846 Snijders, A.M., Langley, S.A., Kim, Y.-M., Brislawn, C.J., Noecker, C., Zink, E.M., Fansler,  
847 S.J., Casey, C.P., Miller, D.R., Huang, Y., et al. (2016). Influence of early life exposure, host  
848 genetics and diet on the mouse gut microbiome and metabolome. *Nat. Microbiol.* *2*, 16221.

849 Turnbaugh, P.J., Ridaura, V.K., Faith, J.J., Rey, F.E., Knight, R., and Gordon, J.I. (2009). The  
850 effect of diet on the human gut microbiome: a metagenomic analysis in humanized gnotobiotic  
851 mice. *Sci. Transl. Med.* *1*, 6ra14.

852 Vaishnava, S., Yamamoto, M., Severson, K.M., Ruhn, K.A., Yu, X., Koren, O., Ley, R.,  
853 Wakeland, E.K., and Hooper, L. V. (2011). The antibacterial lectin RegIII $\gamma$  promotes the spatial  
854 segregation of microbiota and host in the intestine. *Science* (80-. ). *334*, 255–258.

855 Veldhoen, M., Hirota, K., Westendorf, A.M., Buer, J., Dumoutier, L., Renaud, J.-C., and  
856 Stockinger, B. (2008). The aryl hydrocarbon receptor links TH17-cell-mediated autoimmunity to  
857 environmental toxins. *Nature* *453*, 106–109.

858 Vollmer, W. (2008). Structural variation in the glycan strands of bacterial peptidoglycan. *FEMS*  
859 *Microbiol. Rev.* *32*, 287–306.

860 Walter, J., Britton, R.A., and Roos, S. (2011). Host-microbial symbiosis in the vertebrate  
861 gastrointestinal tract and the *Lactobacillus reuteri* paradigm. *Proc. Natl. Acad. Sci.* *108*, 4645–  
862 4652.

863 Youngblut, N.D., De La Cuesta-Zuluaga, J., Reischer, G.H., Dauser, S., Schuster, N., Walzer, C.,  
864 Stalder, G., Farnleitner, A.H., and Ley, R.E. (2020). Large-Scale Metagenome Assembly  
865 Reveals Novel Animal-Associated Microbial Genomes, Biosynthetic Gene Clusters, and Other  
866 Genetic Diversity.

867 Zarrinpar, A., Chaix, A., Yooseph, S., and Panda, S. (2014). Diet and feeding pattern affect the  
868 diurnal dynamics of the gut microbiome. *Cell Metab.* *20*, 1006–1017.

869 Zhang, S., Oh, J.-H., Alexander, L.M., Özçam, M., and Van Pijkeren, J.-P. (2018). D-Ala-D-Ala  
870 ligase as a broad host-range counterselection marker in vancomycin-resistant lactic acid bacteria.  
871 *J. Bacteriol.* JB.00607-17.

872 Zhao, W.T., Shi, X., Xian, P.J., Feng, Z., Yang, J., and Yang, X.L. (2021). A new fusicoccane  
873 diterpene and a new polyene from the plant endophytic fungus *Talaromyces pinophilus* and their  
874 antimicrobial activities. *Nat. Prod. Res.* *35*, 124–130.

875 Zheng, J., Wittouck, S., Salvetti, E., Franz, C.M.A.P., Harris, H.M.B., Mattarelli, P., O’toole,  
876 P.W., Pot, B., Vandamme, P., Walter, J., et al. (2020). A taxonomic note on the genus  
877 *Lactobacillus*: Description of 23 novel genera, emended description of the genus *Lactobacillus*  
878 *beijerinckii* 1901, and union of *Lactobacillaceae* and *Leuconostocaceae*. *Int. J. Syst. Evol.*  
879 *Microbiol.* *70*, 2782–2858.

880 Zheng, Y., Valdez, P.A., Danilenko, D.M., Hu, Y., Sa, S.M., Gong, Q., Abbas, A.R., Modrusan,  
881 Z., Ghilardi, N., de Sauvage, F.J., et al. (2008). Interleukin-22 mediates early host defense  
882 against attaching and effacing bacterial pathogens. *Nat. Med.* *14*, 282–289.

883
